# Supplementary material
Source: MDPI journal article supplement (https://www.mdpi.com/2073-4344/12/3/283)

Supporting Information

# Syntheses of Silylene-Bridged Thiophene-Fused Cyclopentadienyl *ansa*-Metallocene Complexes for Preparing High-Performance Supported Catalyst

Sun Mi Jeong <sup>1</sup>, Ju Yong Park <sup>1</sup>, Yong Bin Hyun <sup>1</sup>, Jun Won Baek <sup>1</sup>, Hagjun Kim <sup>2</sup>, Yeokwon Yoon <sup>2</sup>,  
Sangchul Chung <sup>2</sup>, Junseong Lee <sup>3</sup> and Bun Yeoul Lee <sup>1,\*</sup>

<sup>1</sup> Department of Molecular Science and Technology, Ajou University, Suwon 16499, Korea;  
sunmi7523@ajou.ac.kr (S.M.J.); pjy3741@ajou.ac.kr (J.Y.P.); ybh0221@ajou.ac.kr (Y.B.H.);  
btw91@ajou.ac.kr (J.W.B.)

<sup>2</sup> Olefins Technology Team, GS Caltex R&D Center, Daejeon 34122, Korea; khjun@gscaltex.com (H.K.);  
yeokwon@gscaltex.com (Y.Y.); topiron@gscaltex.com (S.C.)

<sup>3</sup> Department of Chemistry, Chonnam National University, Gwangju 61186, Korea; leespy@chonnam.ac.kr

\* Correspondence: bunyeoul@ajou.ac.kr; Tel.: +82-31-219-1844

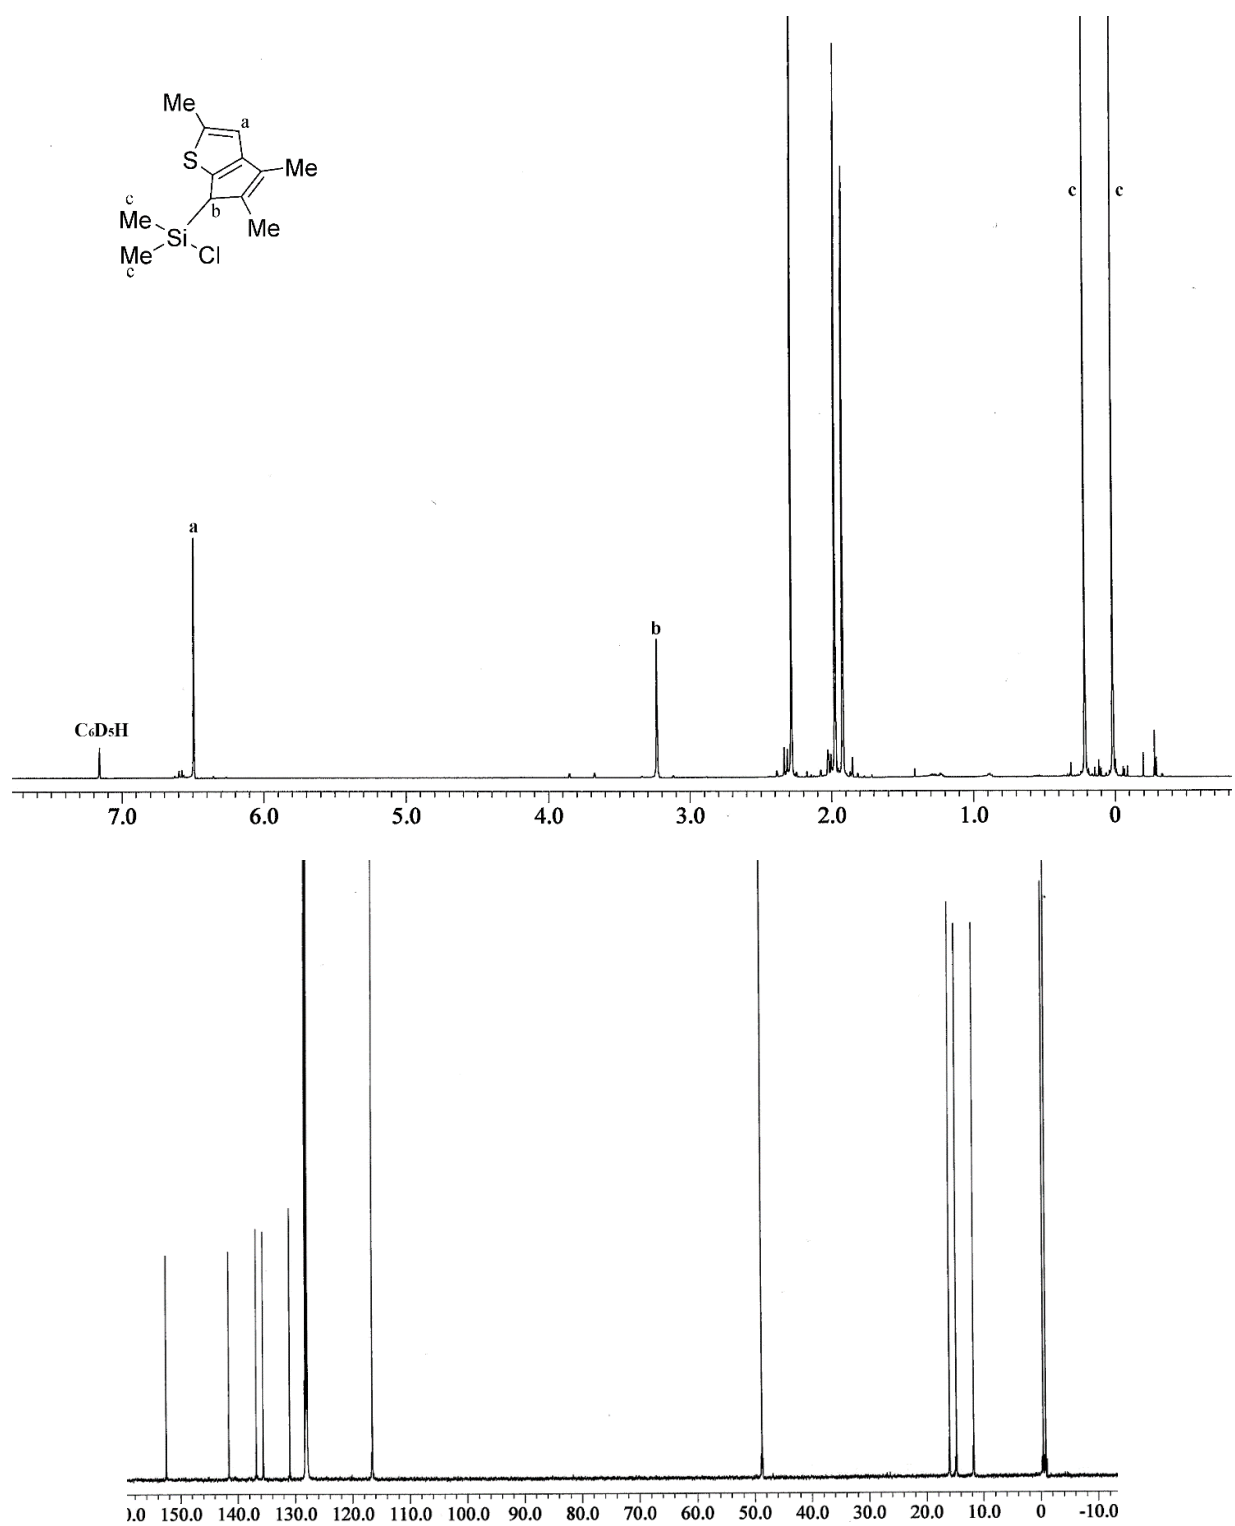

Figure S1.  $^1\text{H}$  and  $^{13}\text{C}$  NMR spectra of **1**.

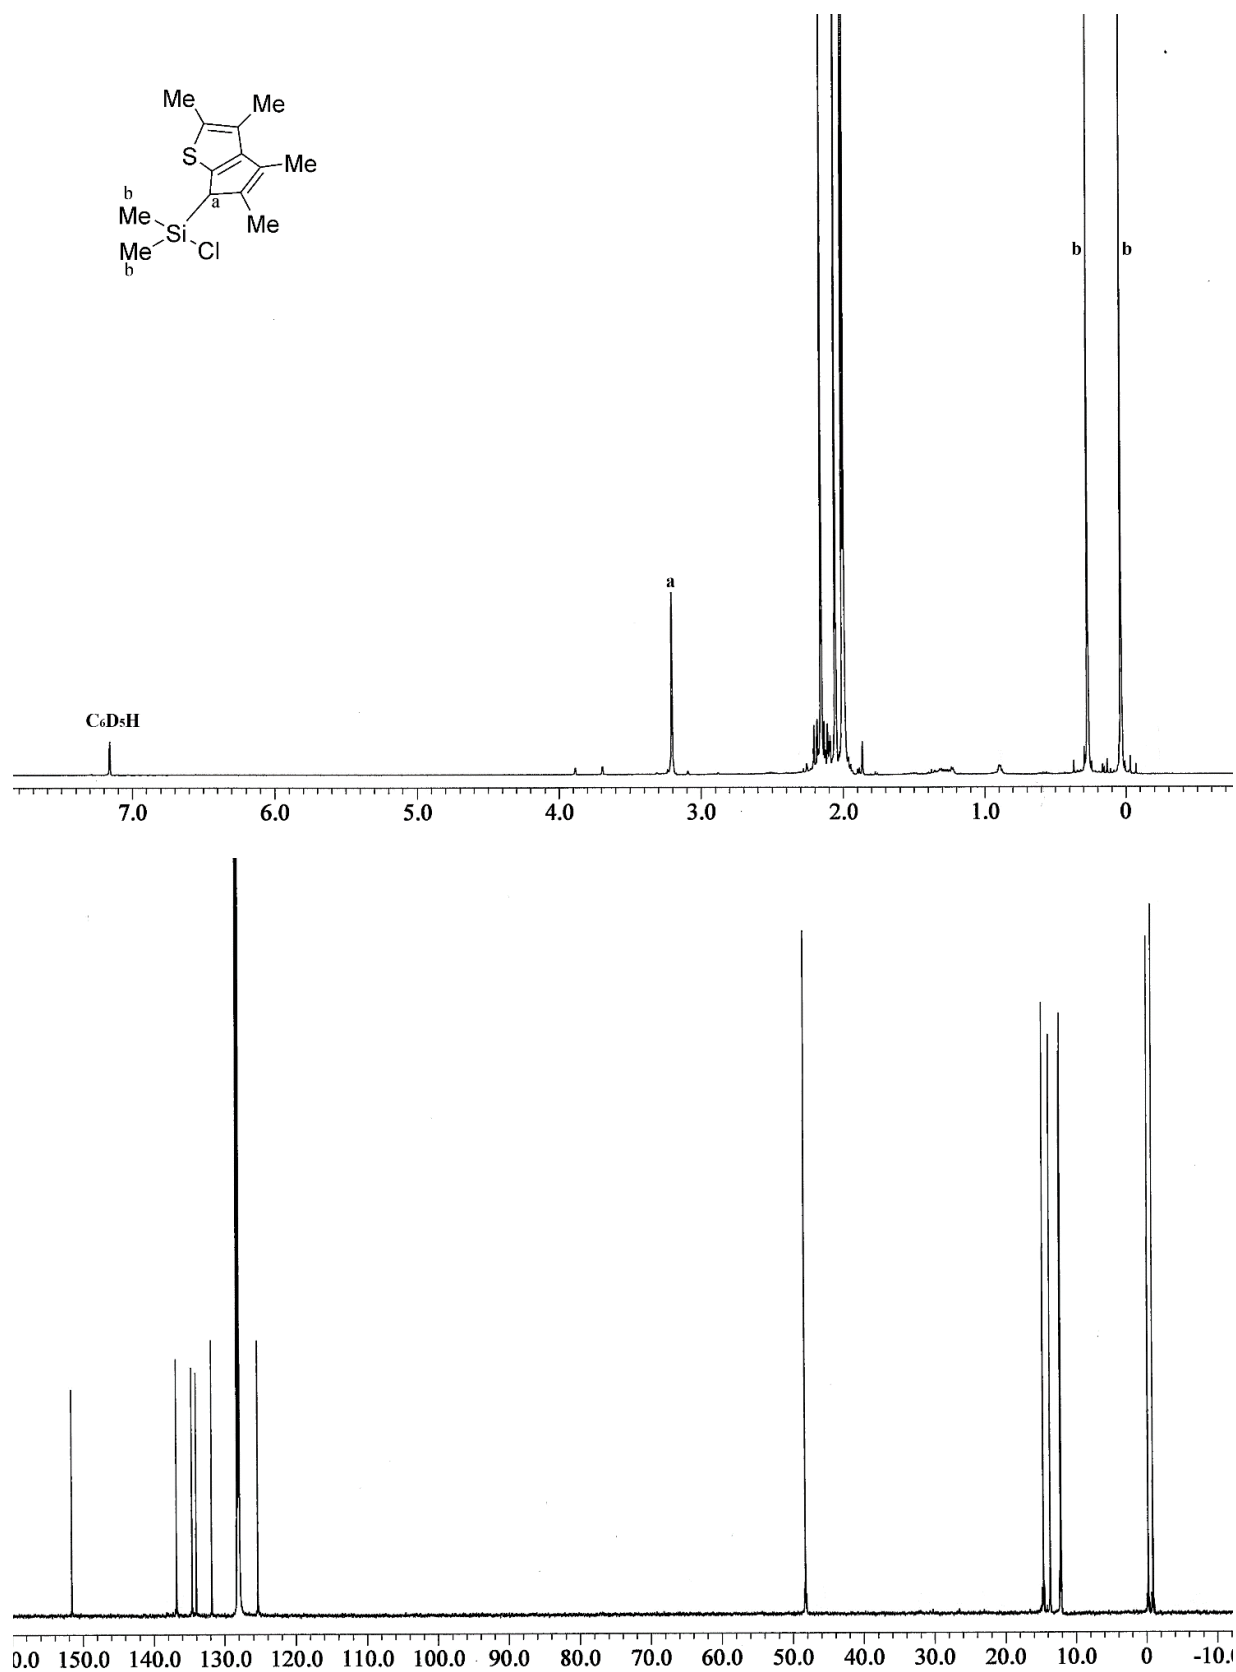

Figure S2.  $^1\text{H}$  and  $^{13}\text{C}$  NMR spectra of 2.

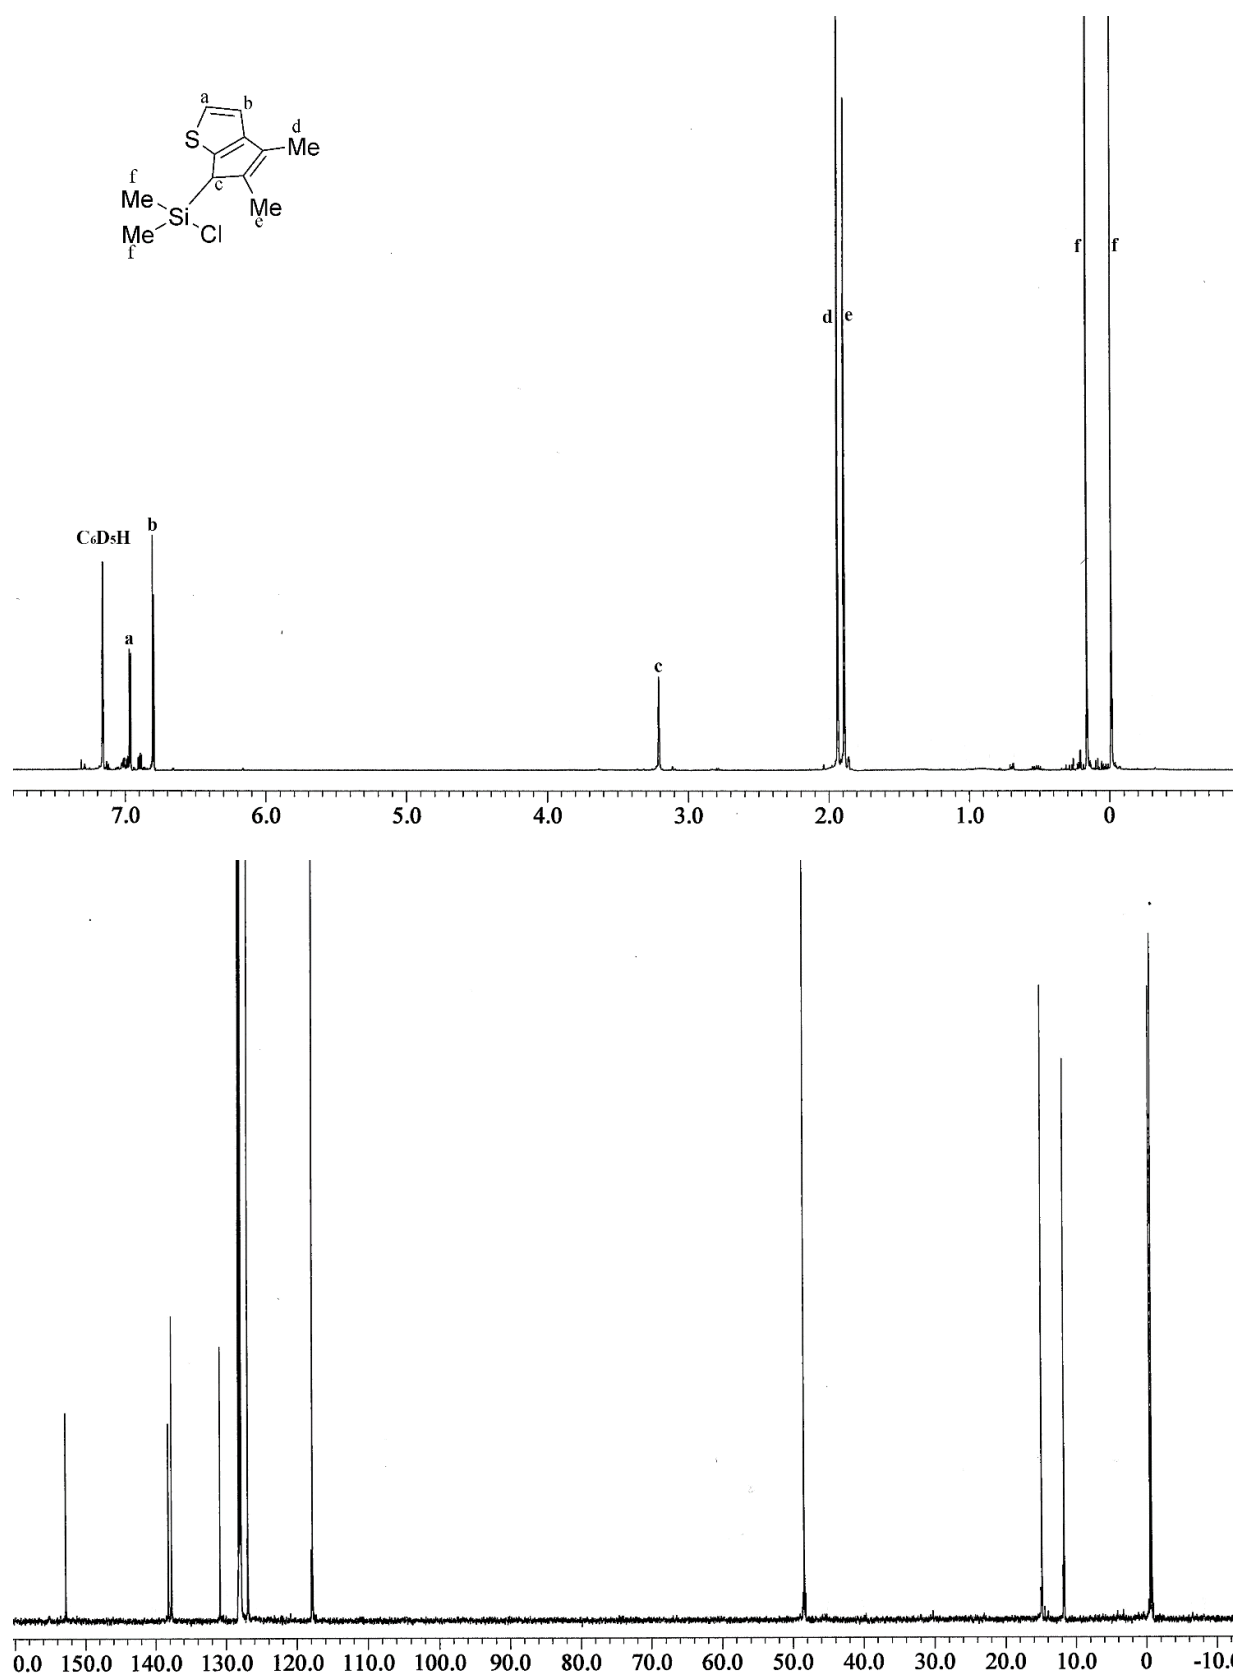

Figure S3.  $^1\text{H}$  and  $^{13}\text{C}$  NMR spectra of 3.

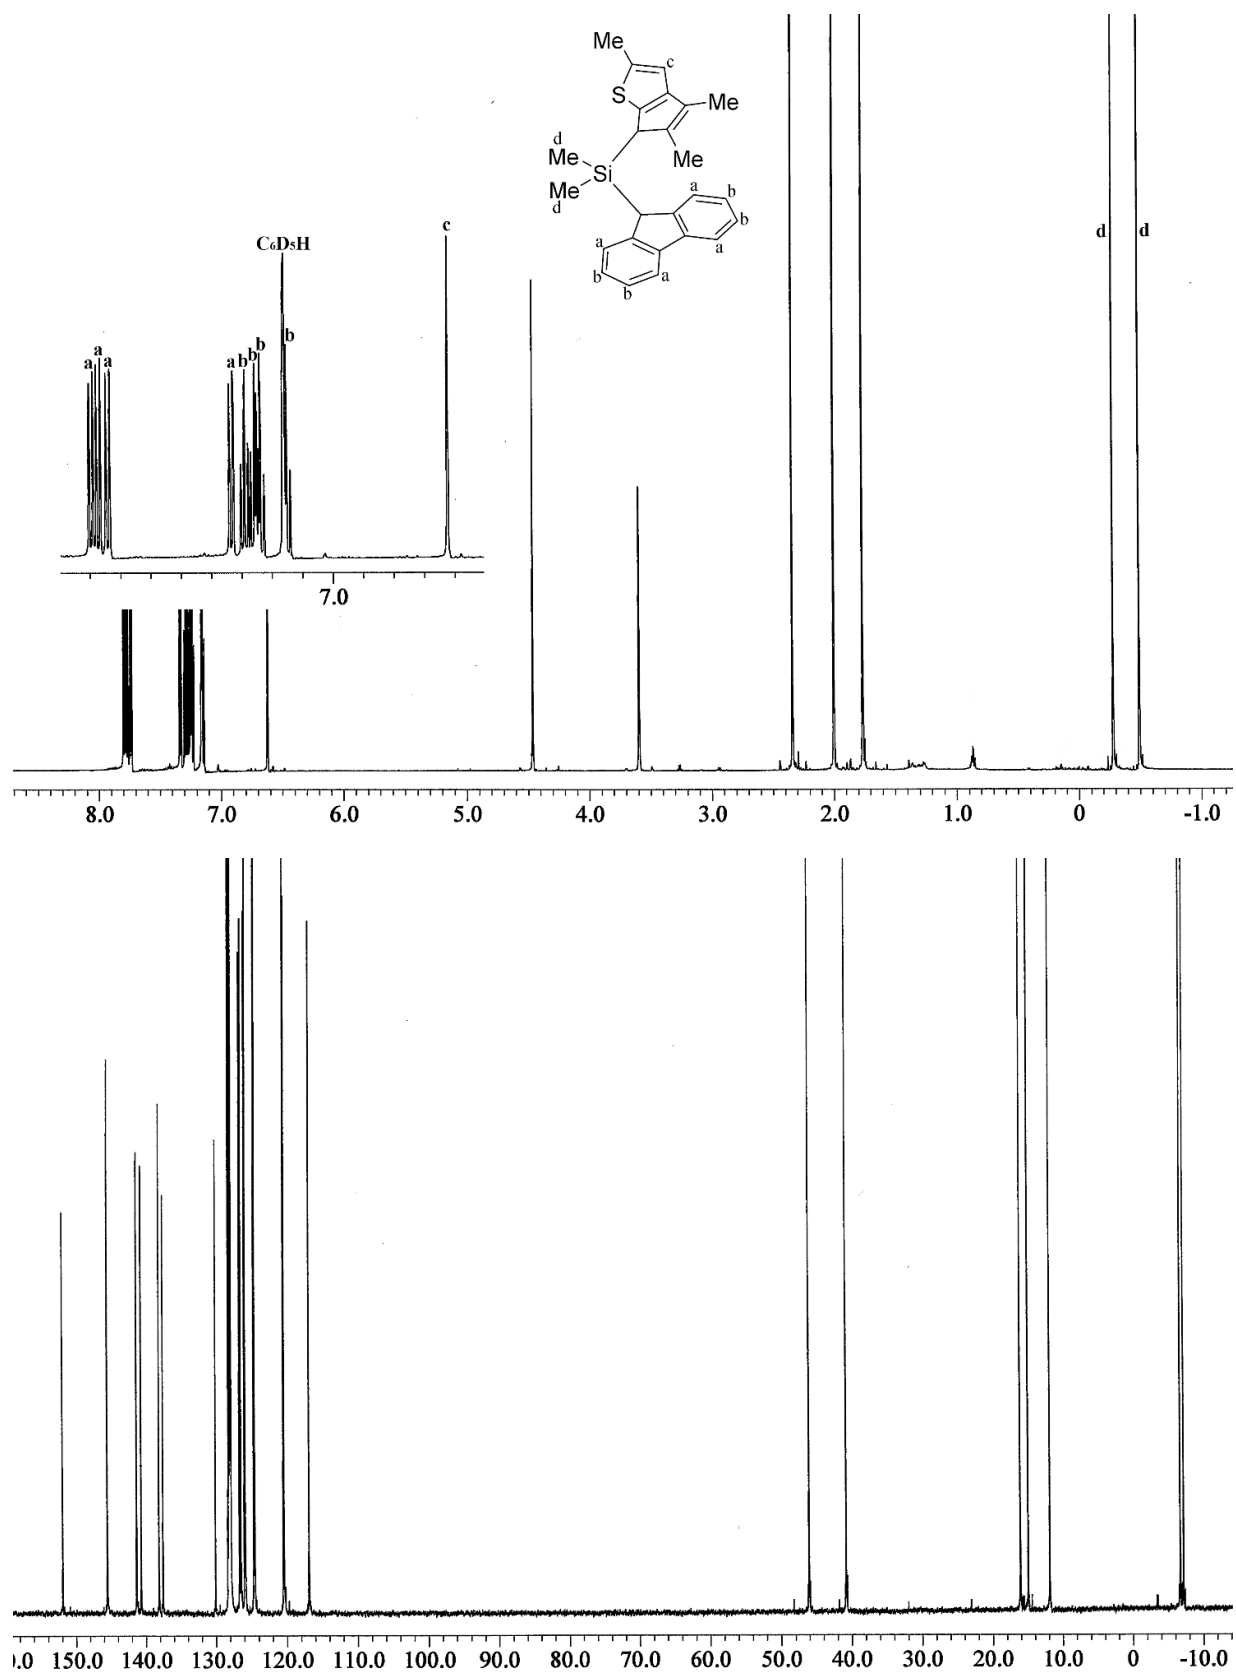

Figure S4.  $^1\text{H}$  and  $^{13}\text{C}$  NMR spectra of **4**.

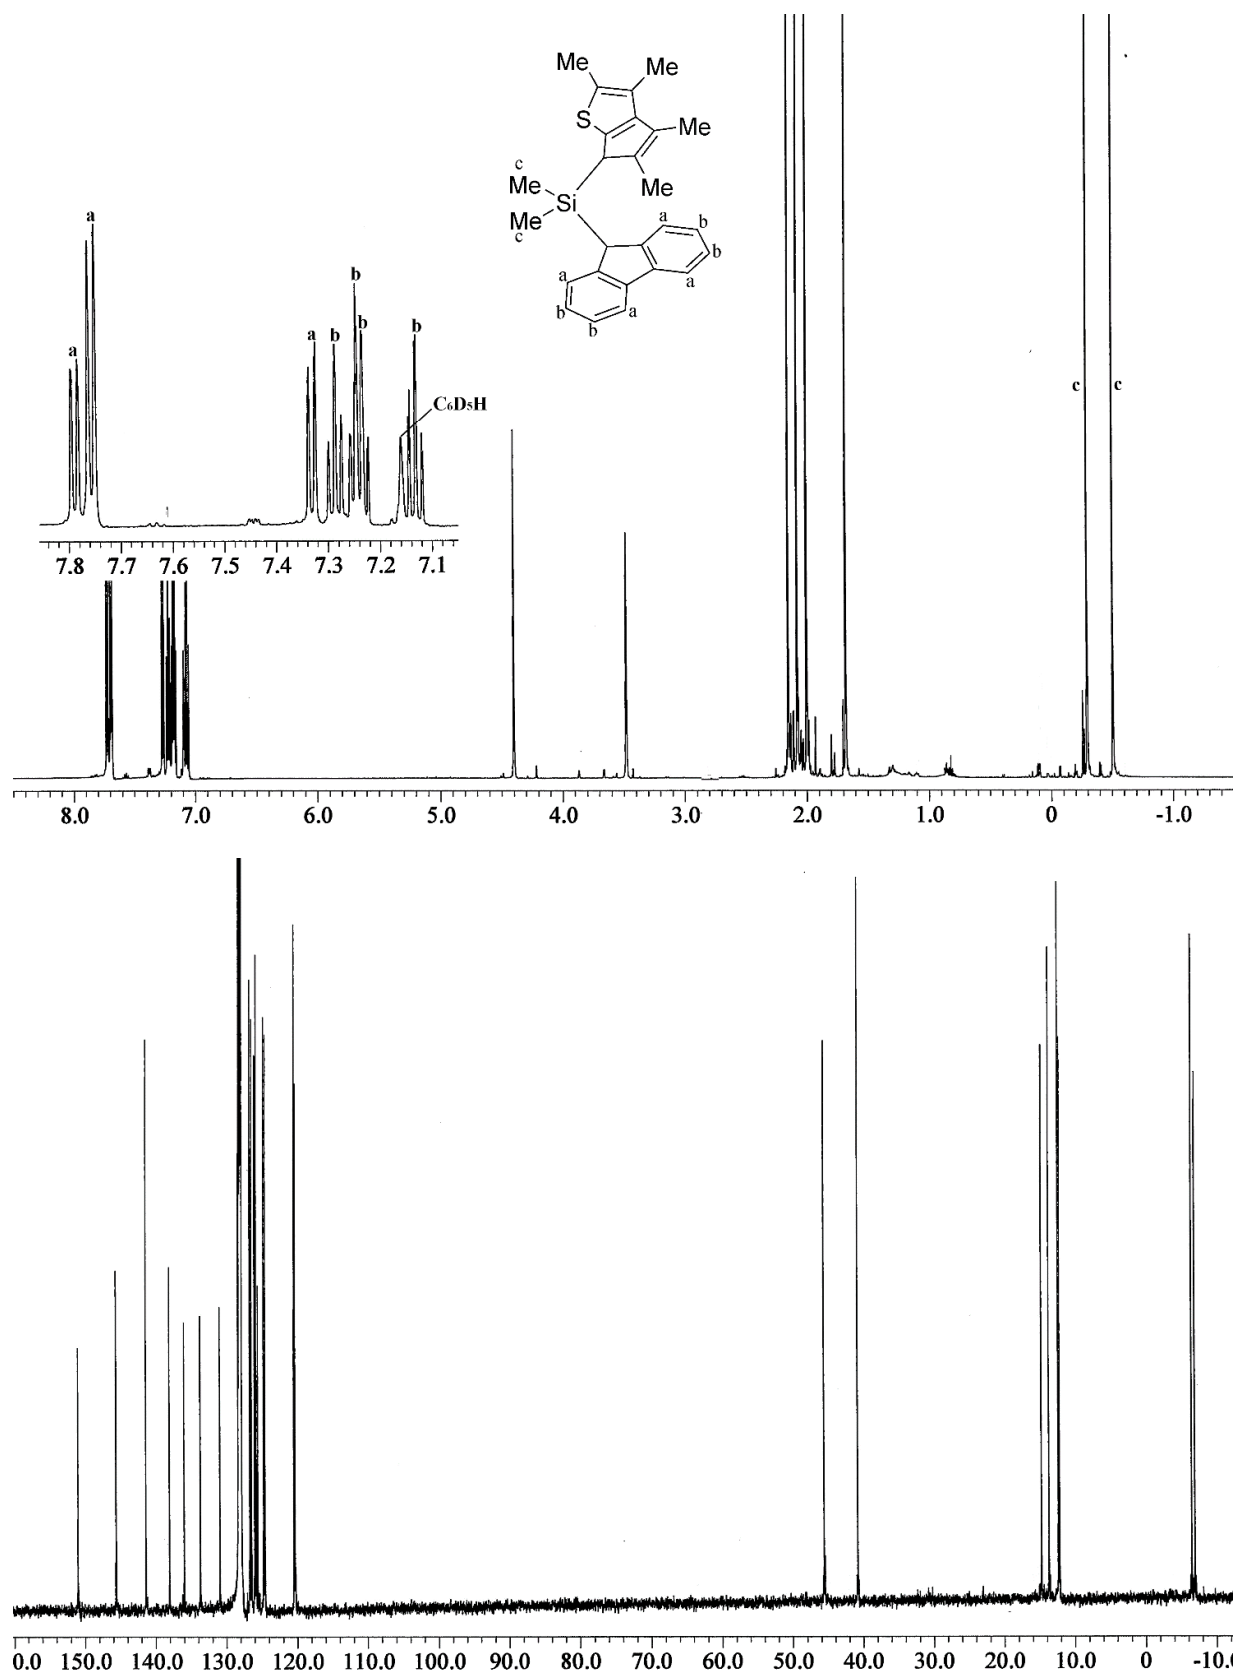

Figure S5.  $^1\text{H}$  and  $^{13}\text{C}$  NMR spectra of 5.

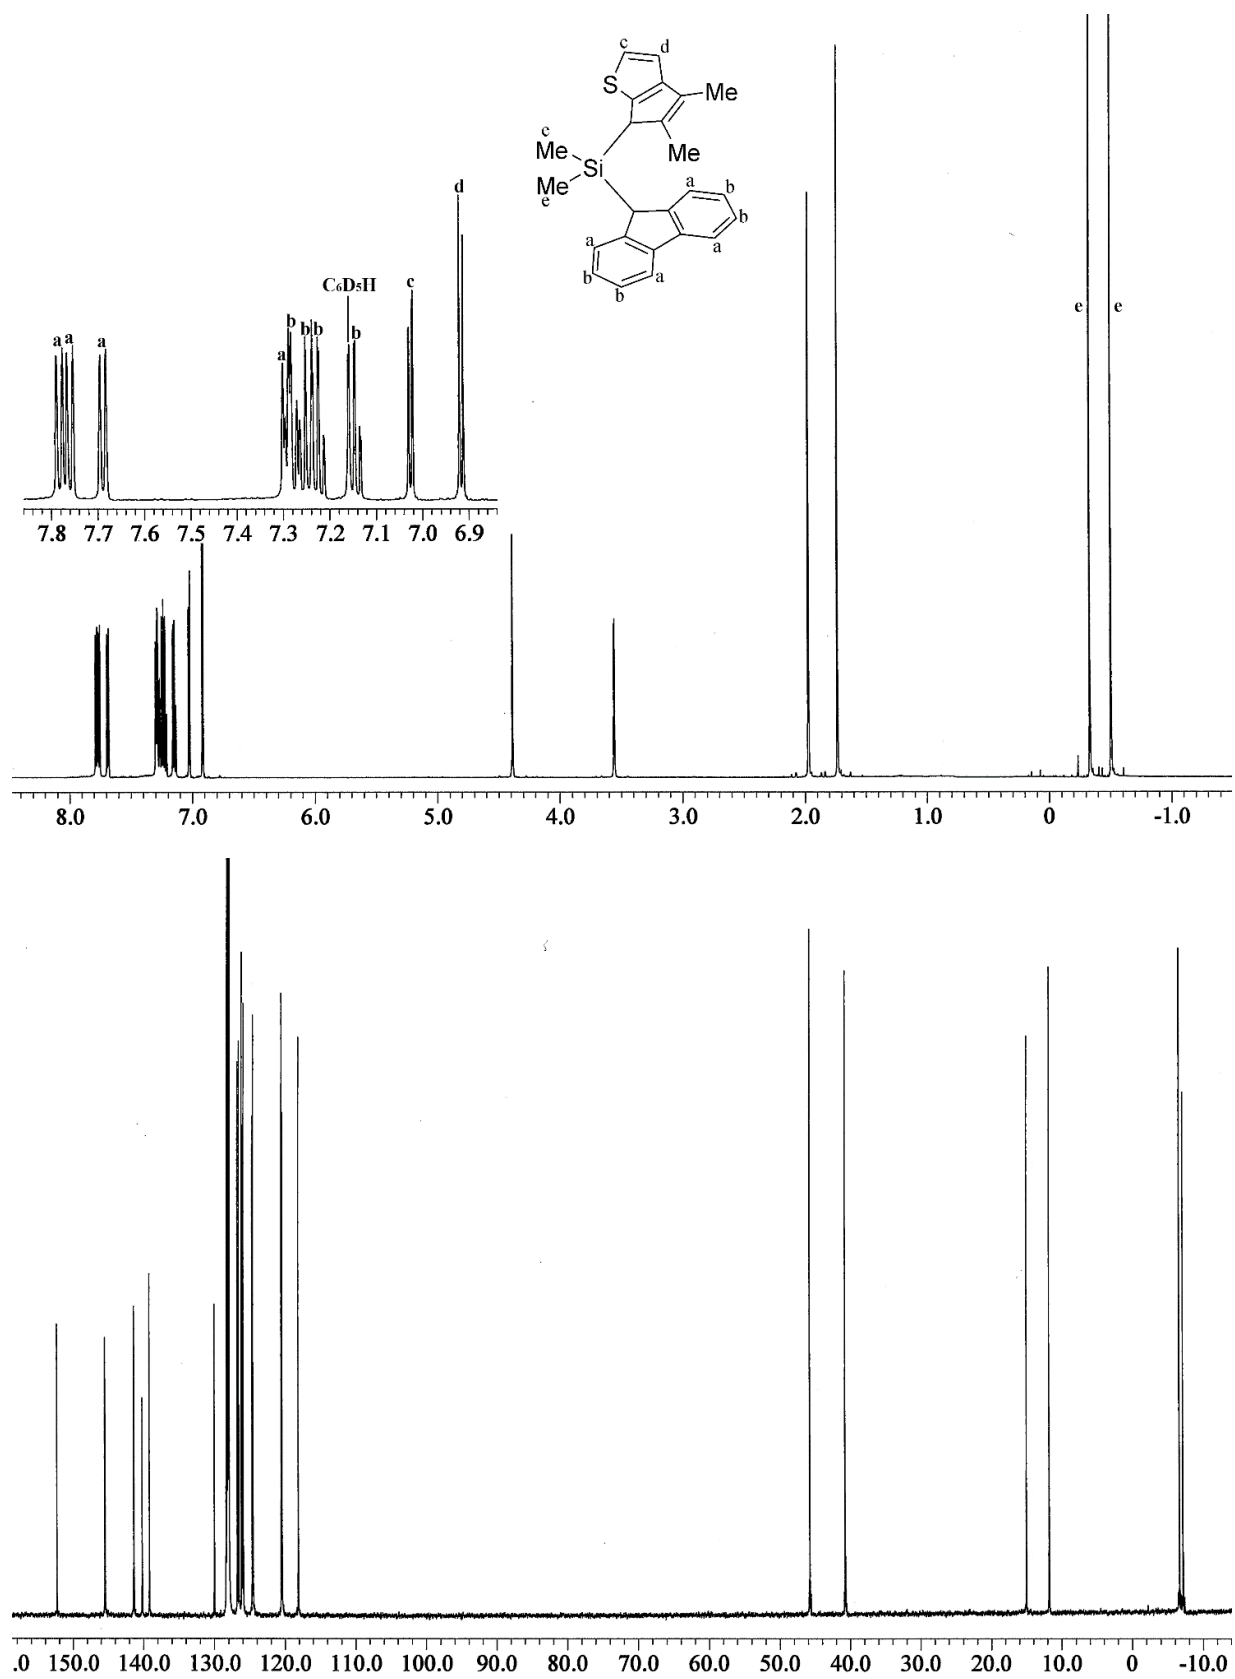

Figure S6.  $^1\text{H}$  and  $^{13}\text{C}$  NMR spectra of **6**.

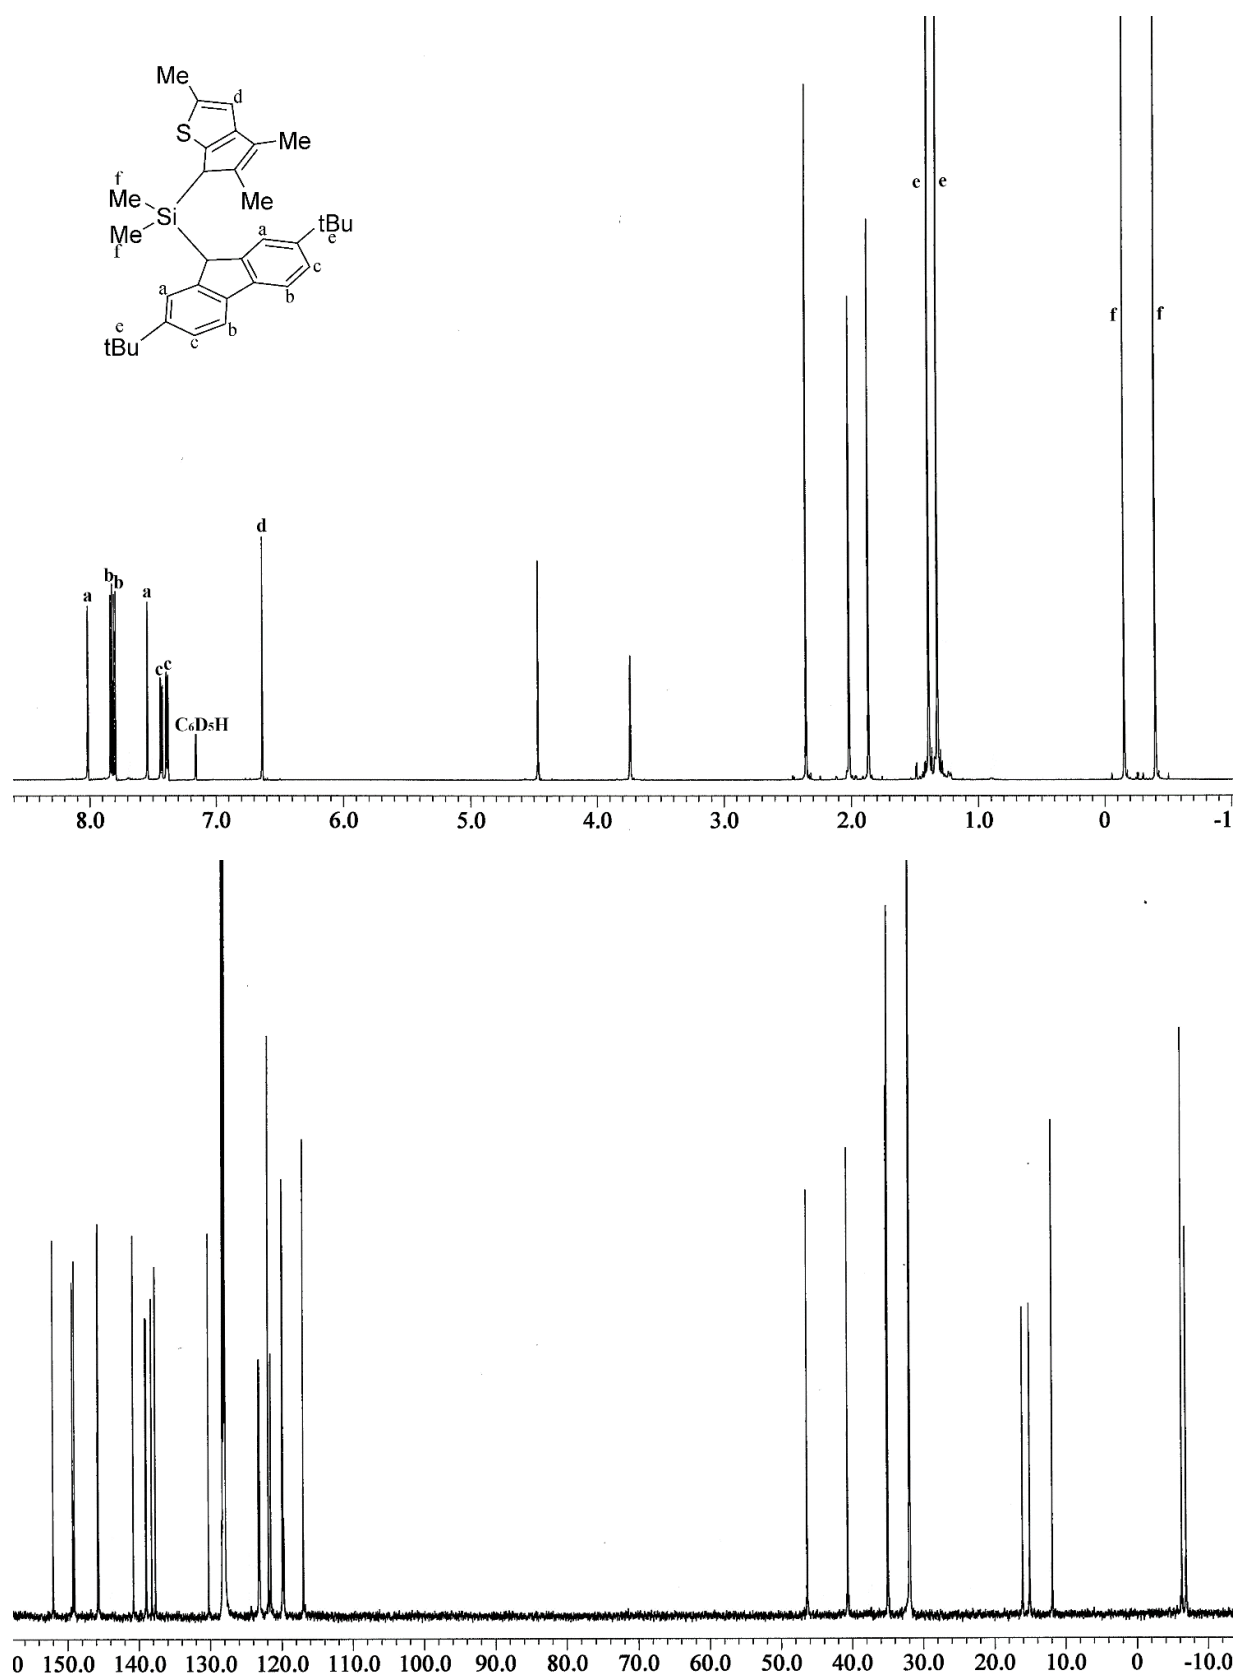

Figure S7.  $^1\text{H}$  and  $^{13}\text{C}$  NMR spectra of 7.



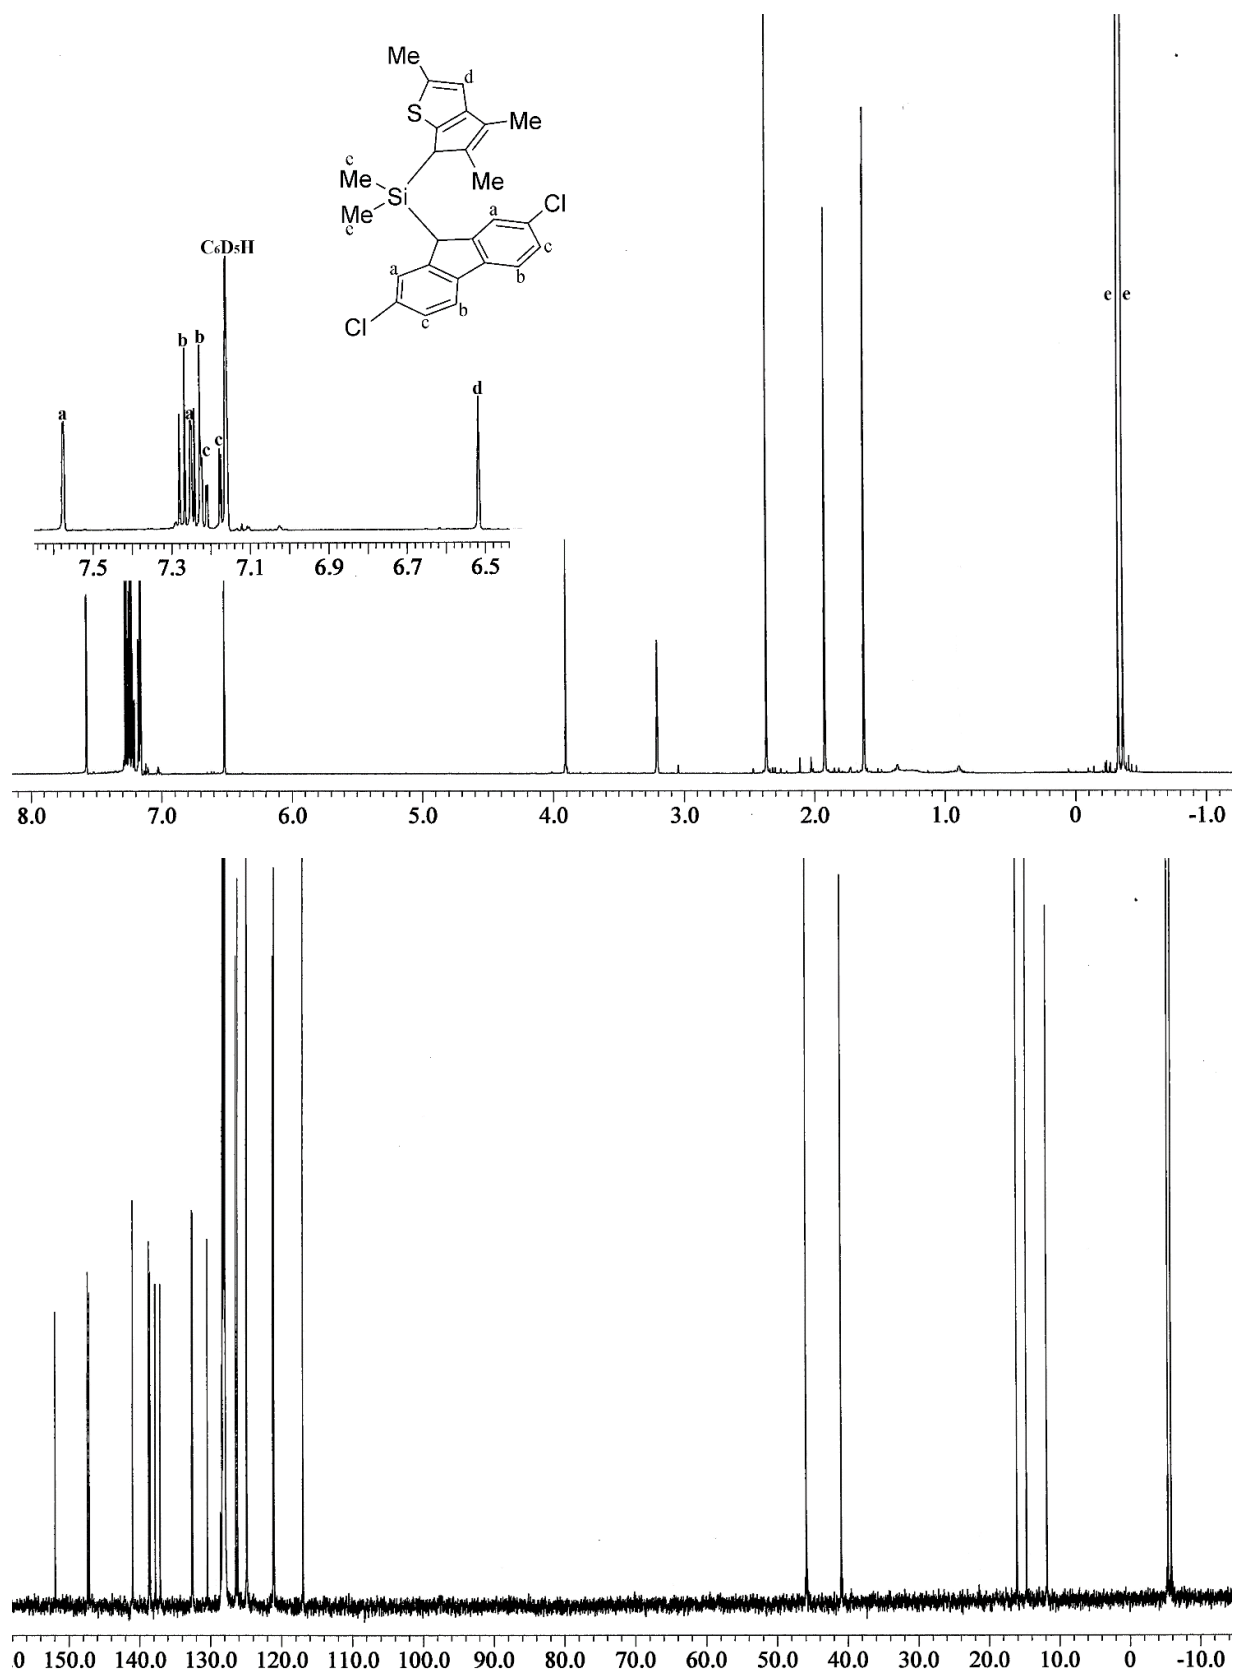

Figure S8.  $^1\text{H}$  and  $^{13}\text{C}$  NMR spectra of 8.

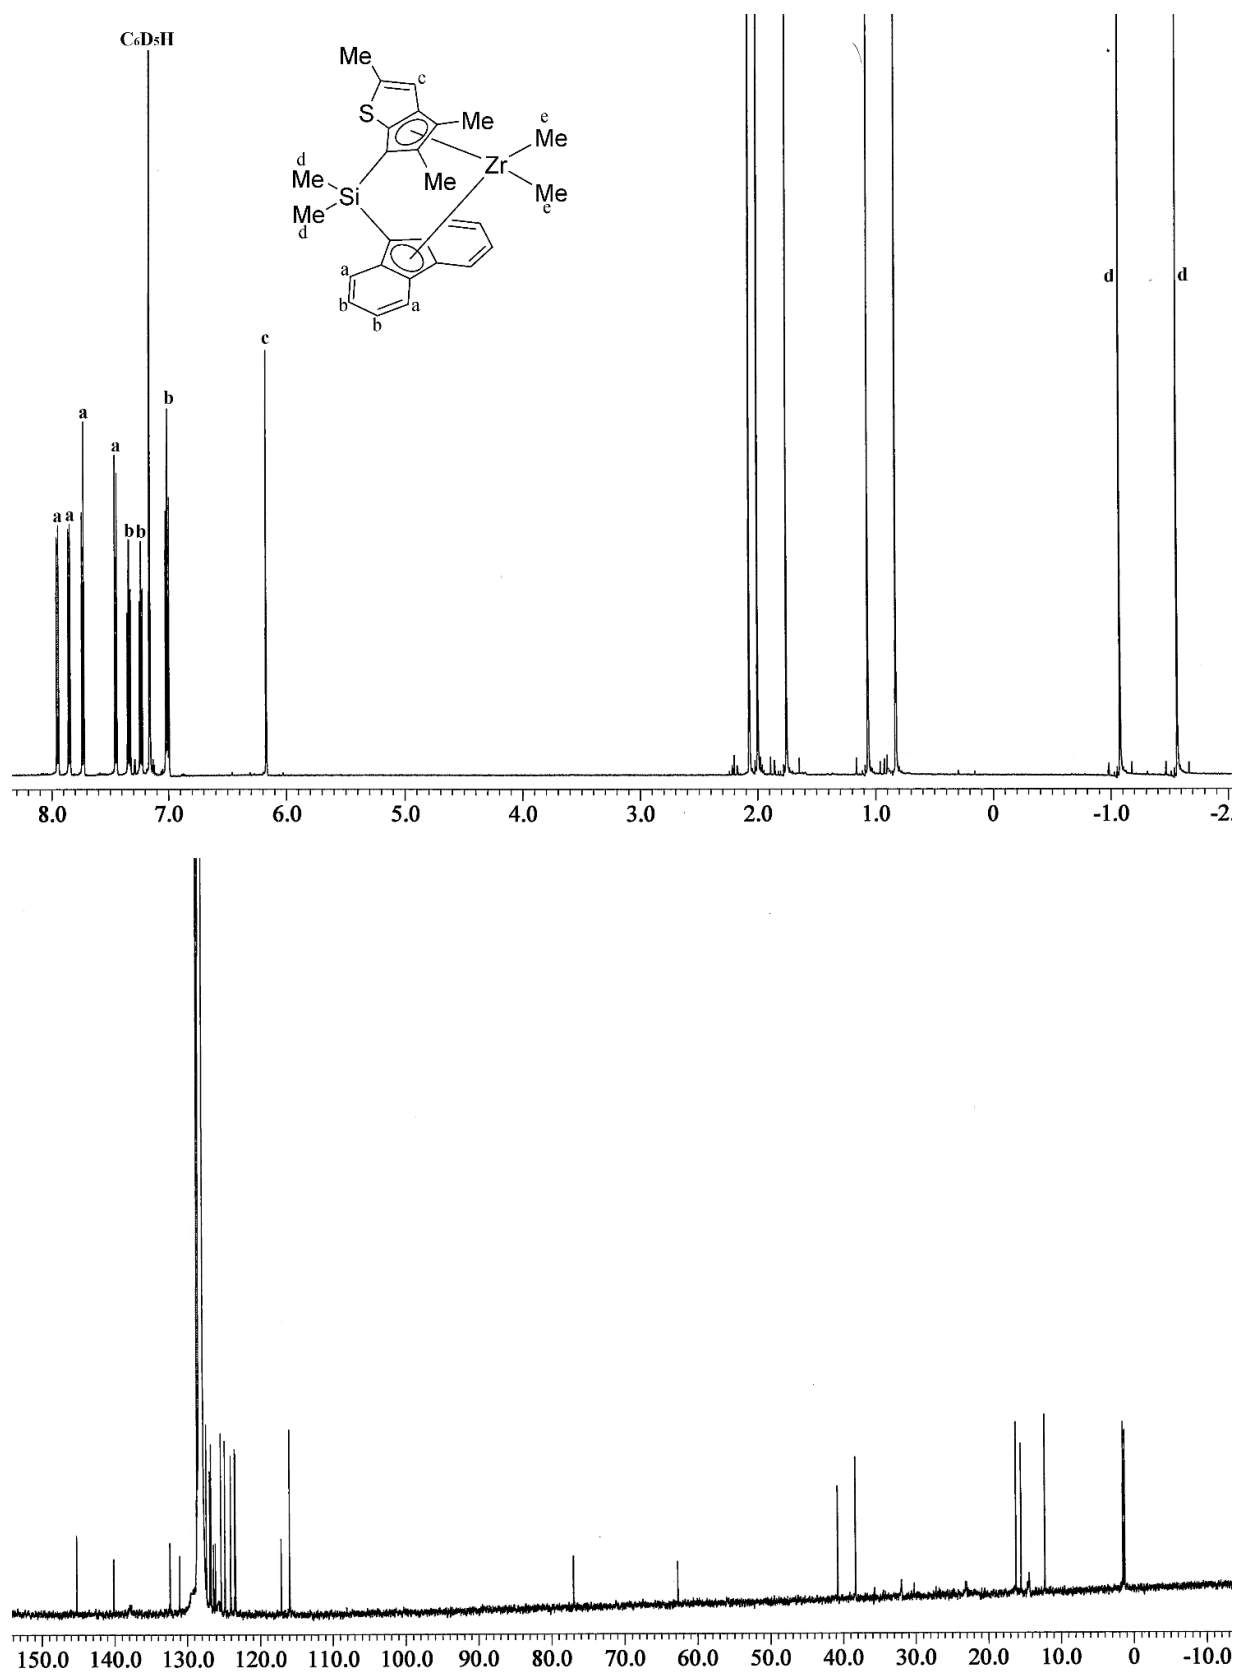

Figure S9.  $^1\text{H}$  and  $^{13}\text{C}$  NMR spectra of 9.

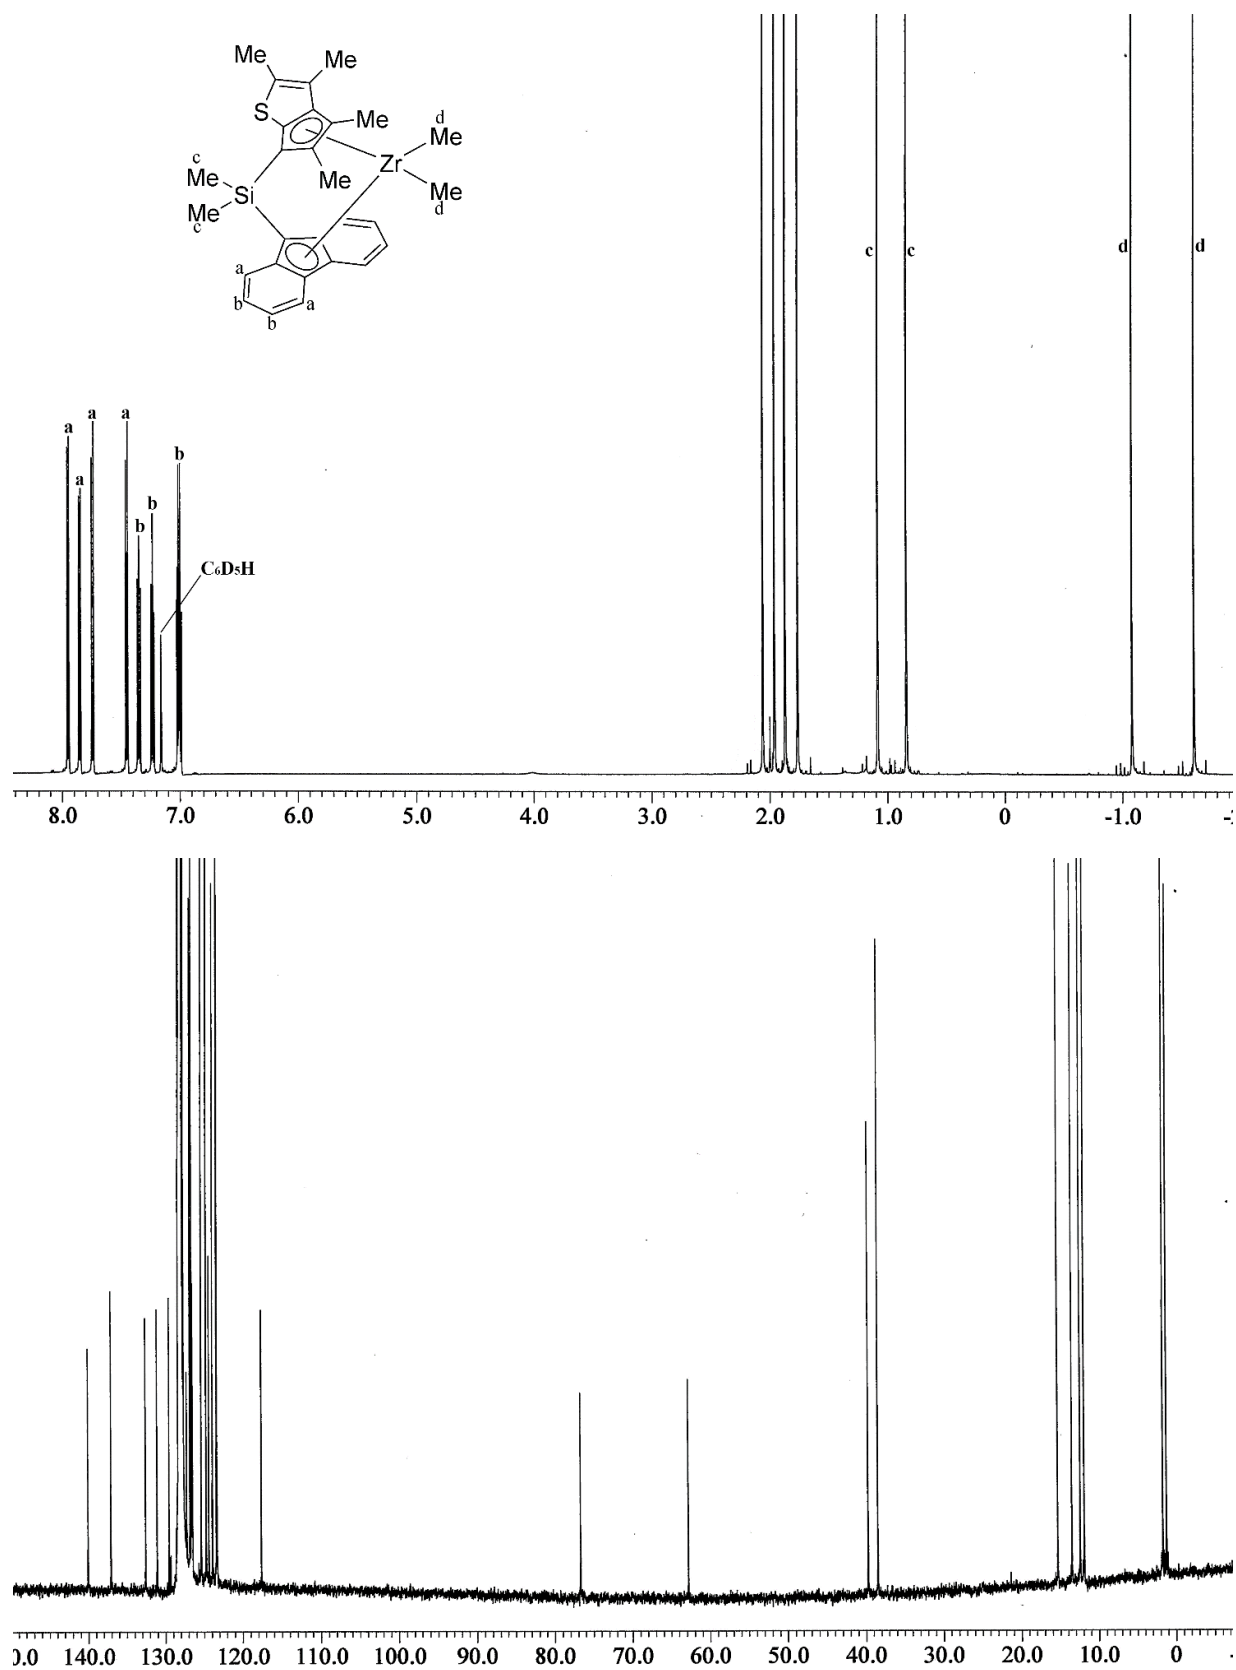

Figure S10.  $^1\text{H}$  and  $^{13}\text{C}$  NMR spectra of 10.

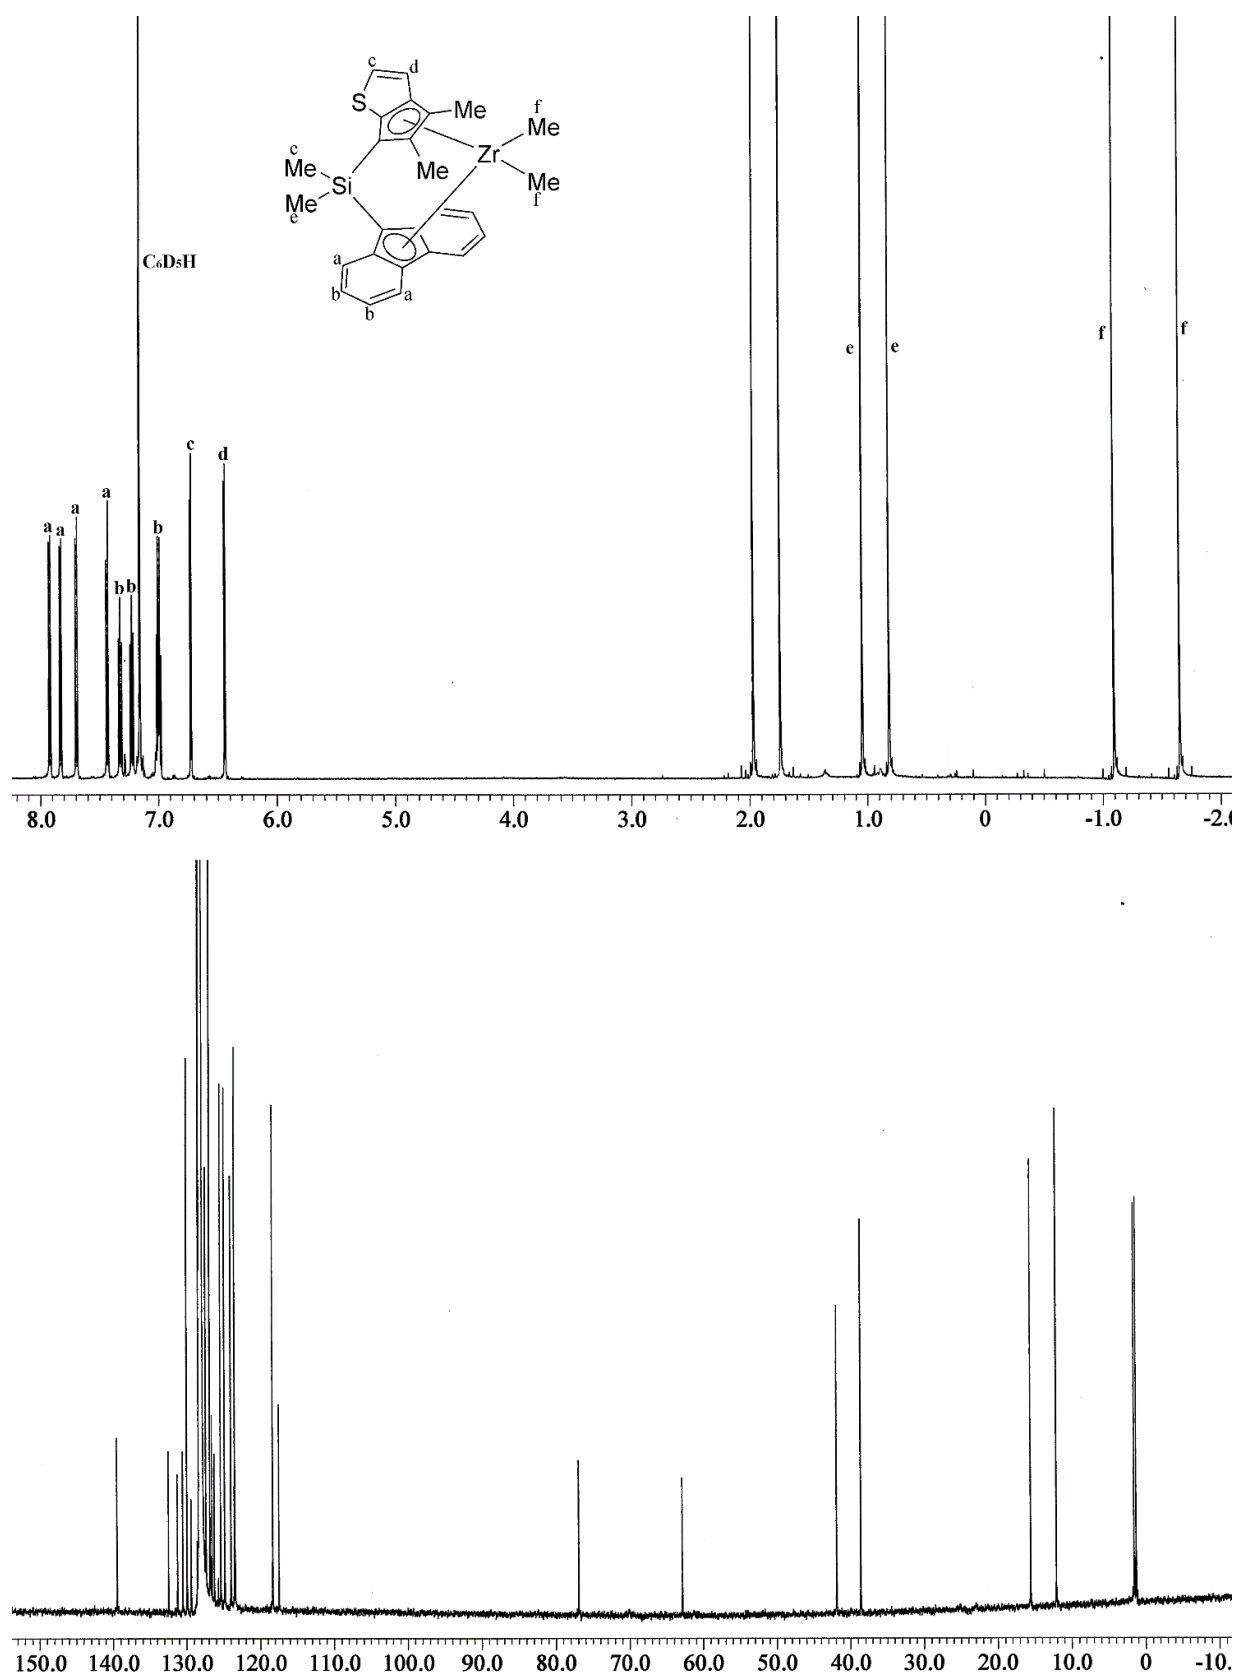

Figure S11.  $^1\text{H}$  and  $^{13}\text{C}$  NMR spectra of 11.

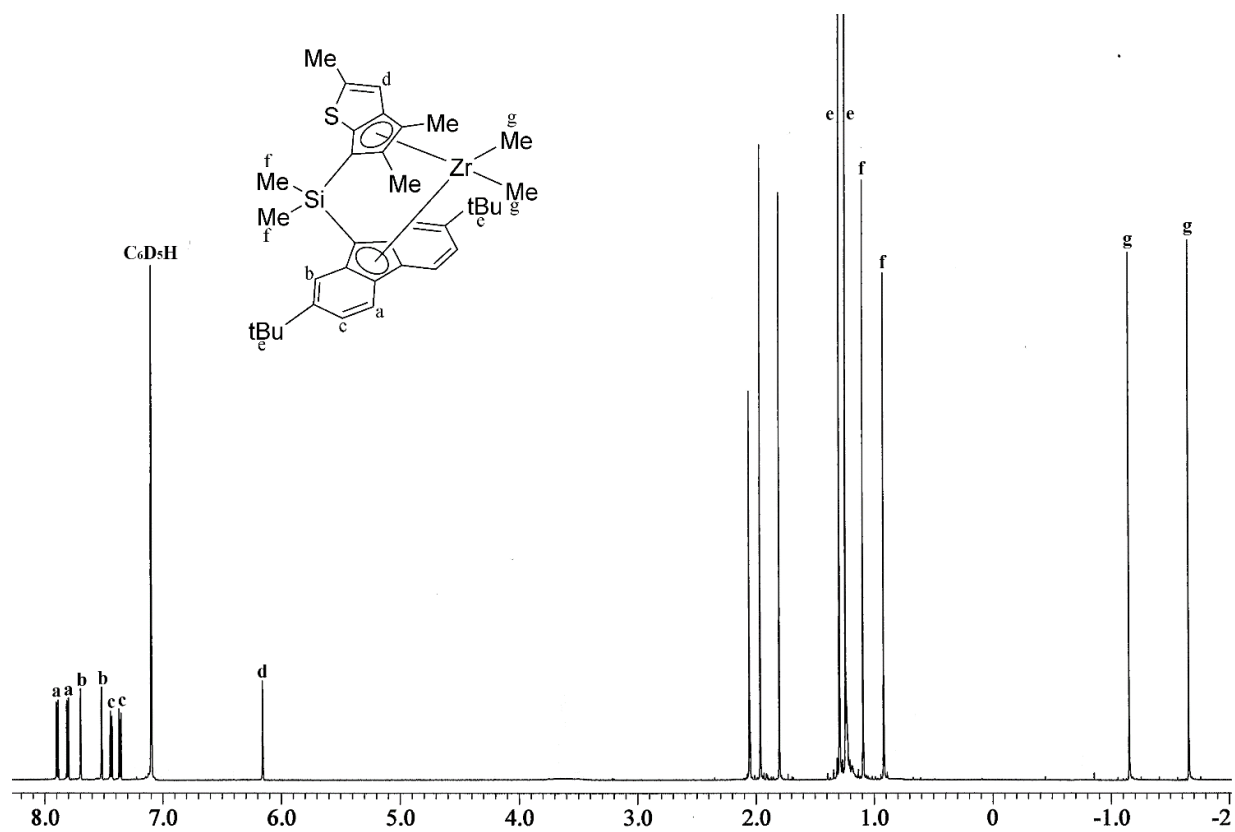

Figure S12.  $^1\text{H}$  NMR spectrum of **12**.

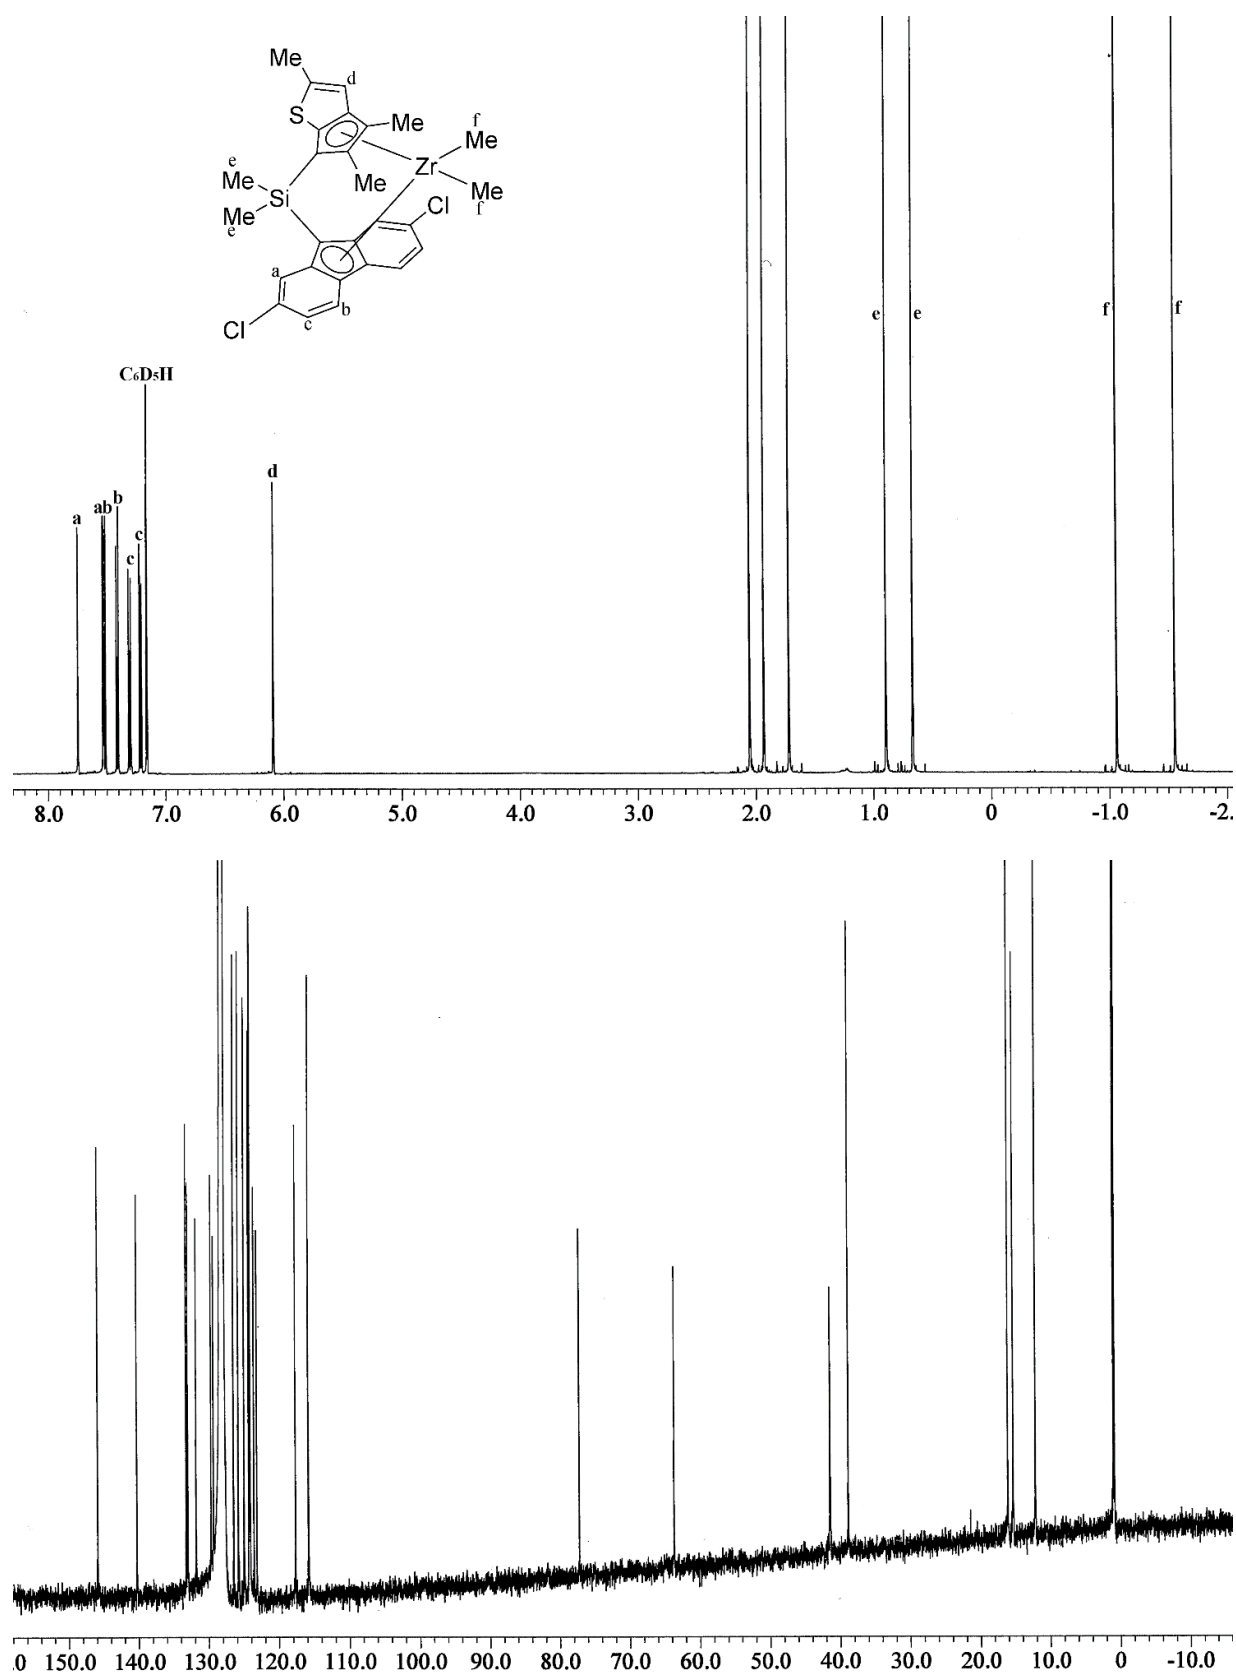

Figure S13.  $^1\text{H}$  and  $^{13}\text{C}$  NMR spectra of 13.

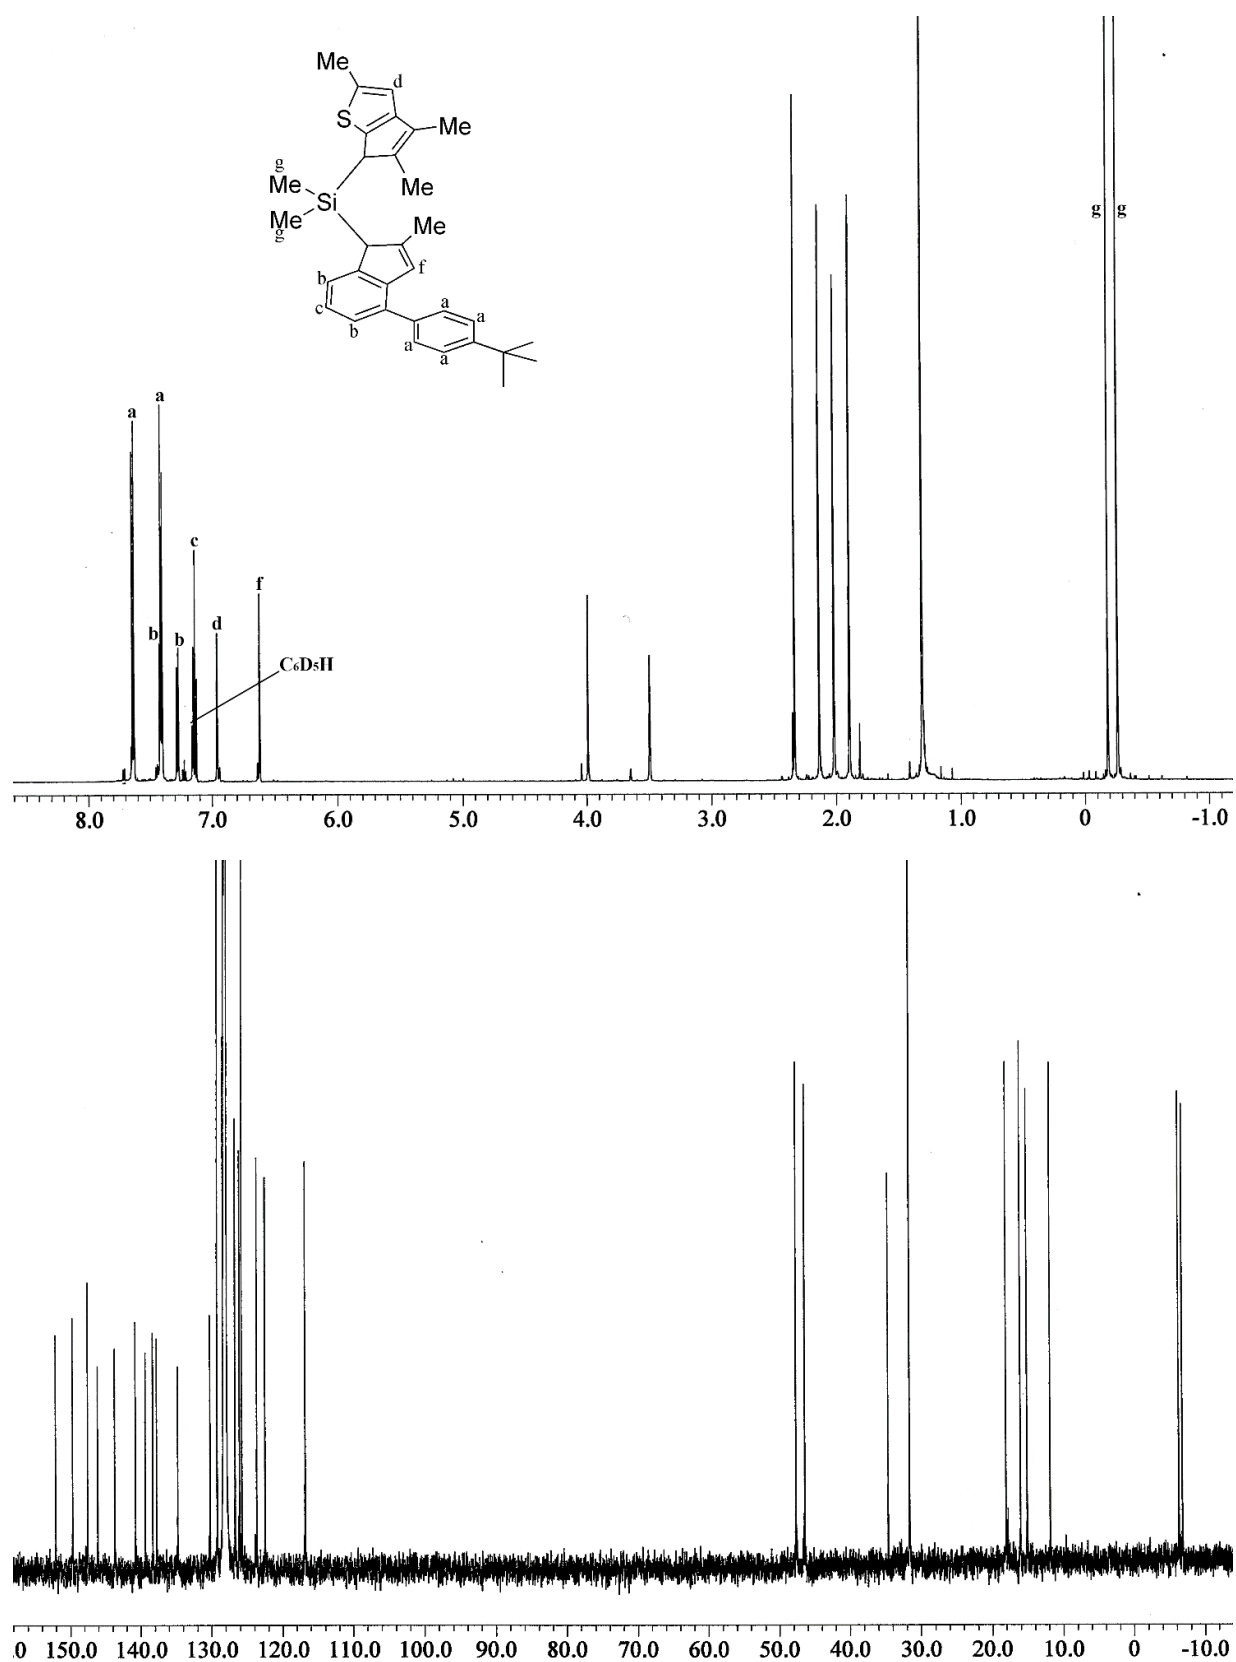

Figure S14.  $^1\text{H}$  and  $^{13}\text{C}$  NMR spectra of 14.

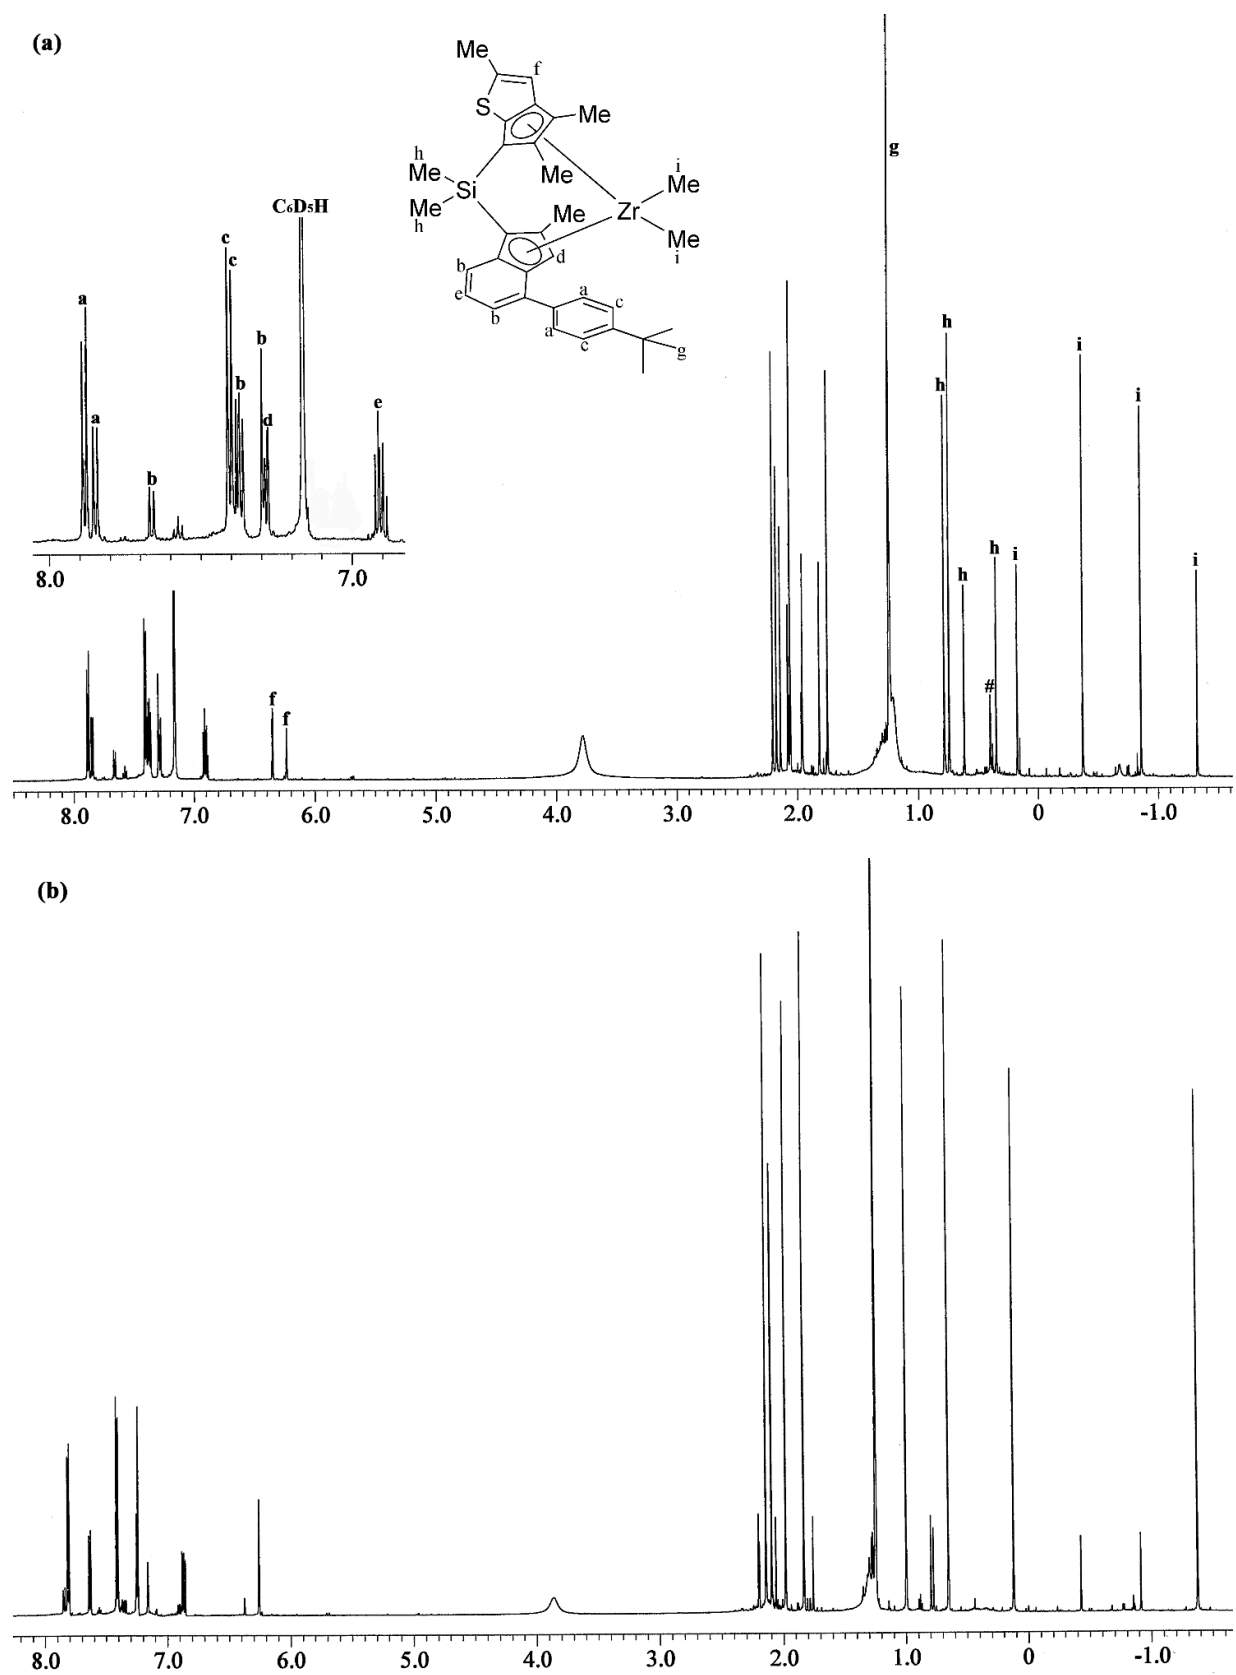

Figure S15.  $^1\text{H}$  NMR spectra of 15.



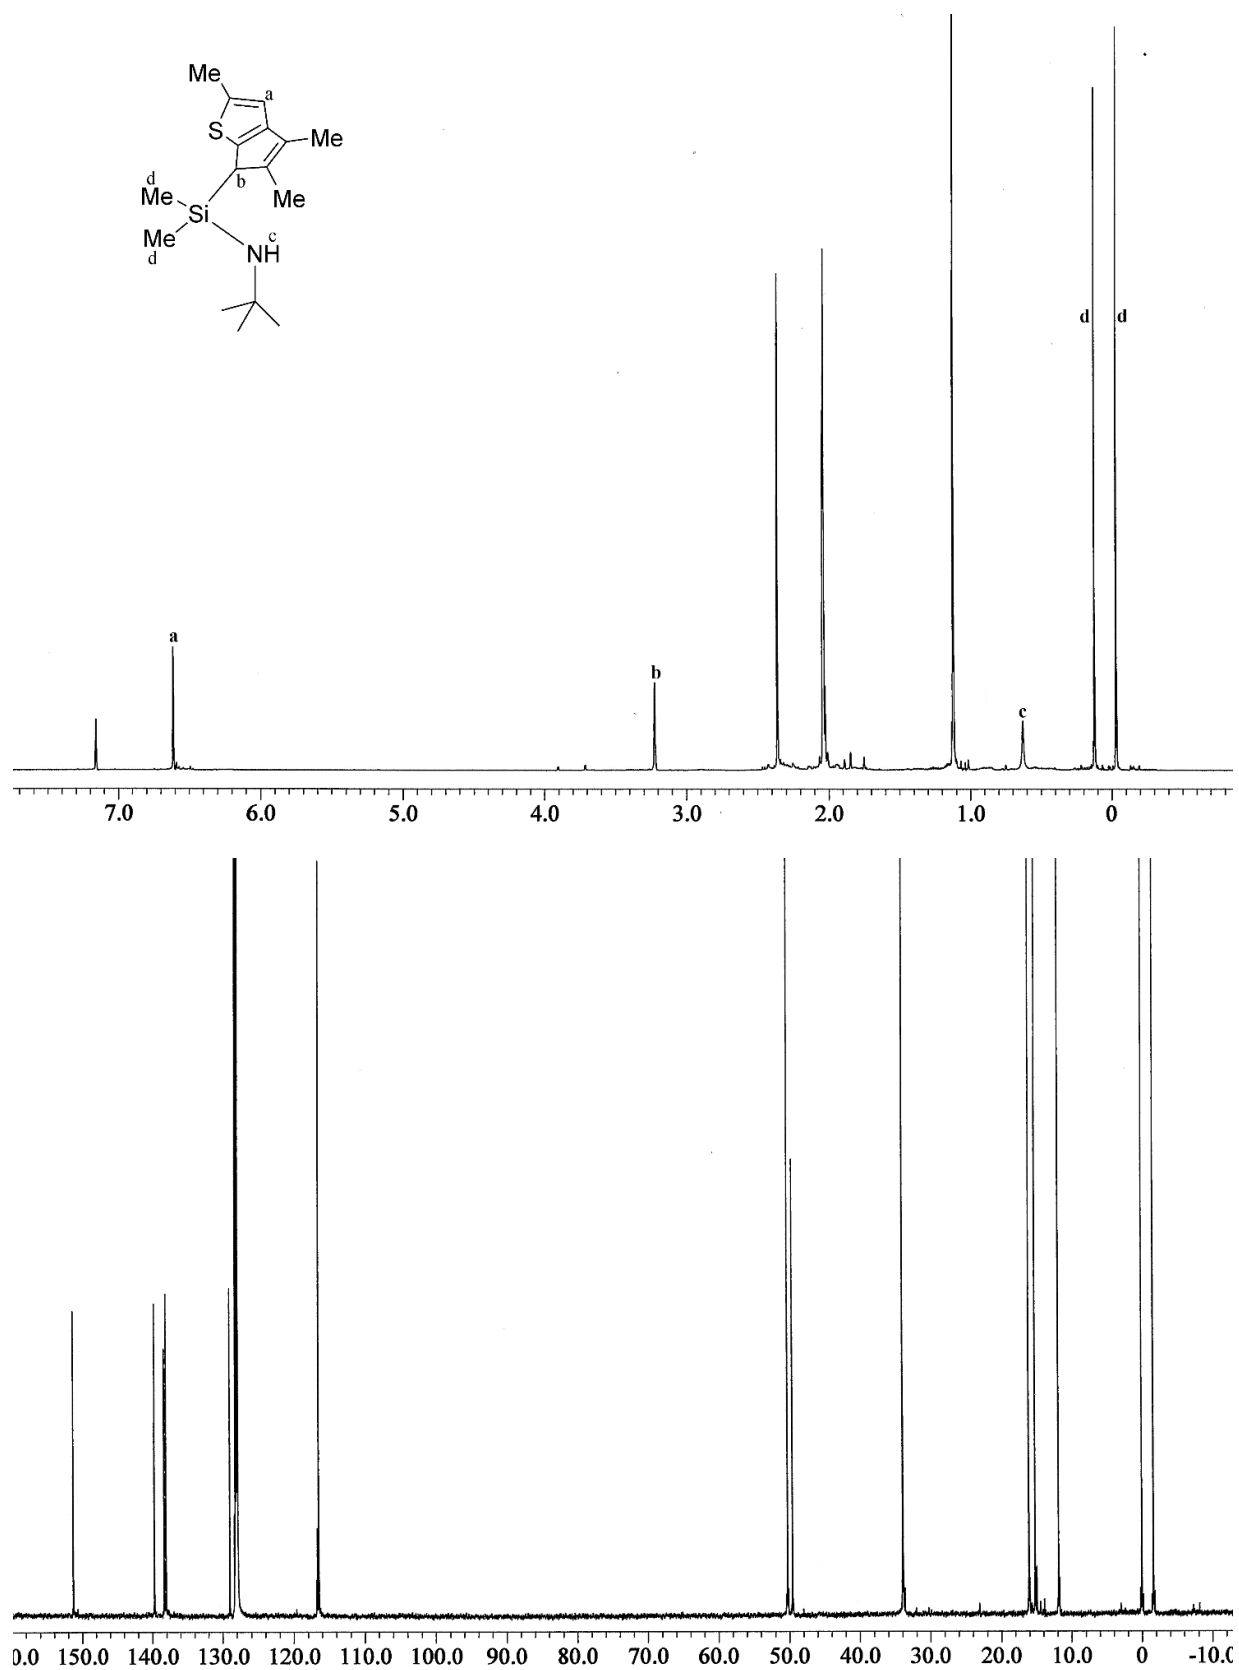

Figure S16.  $^1\text{H}$  and  $^{13}\text{C}$  NMR spectra of 16.

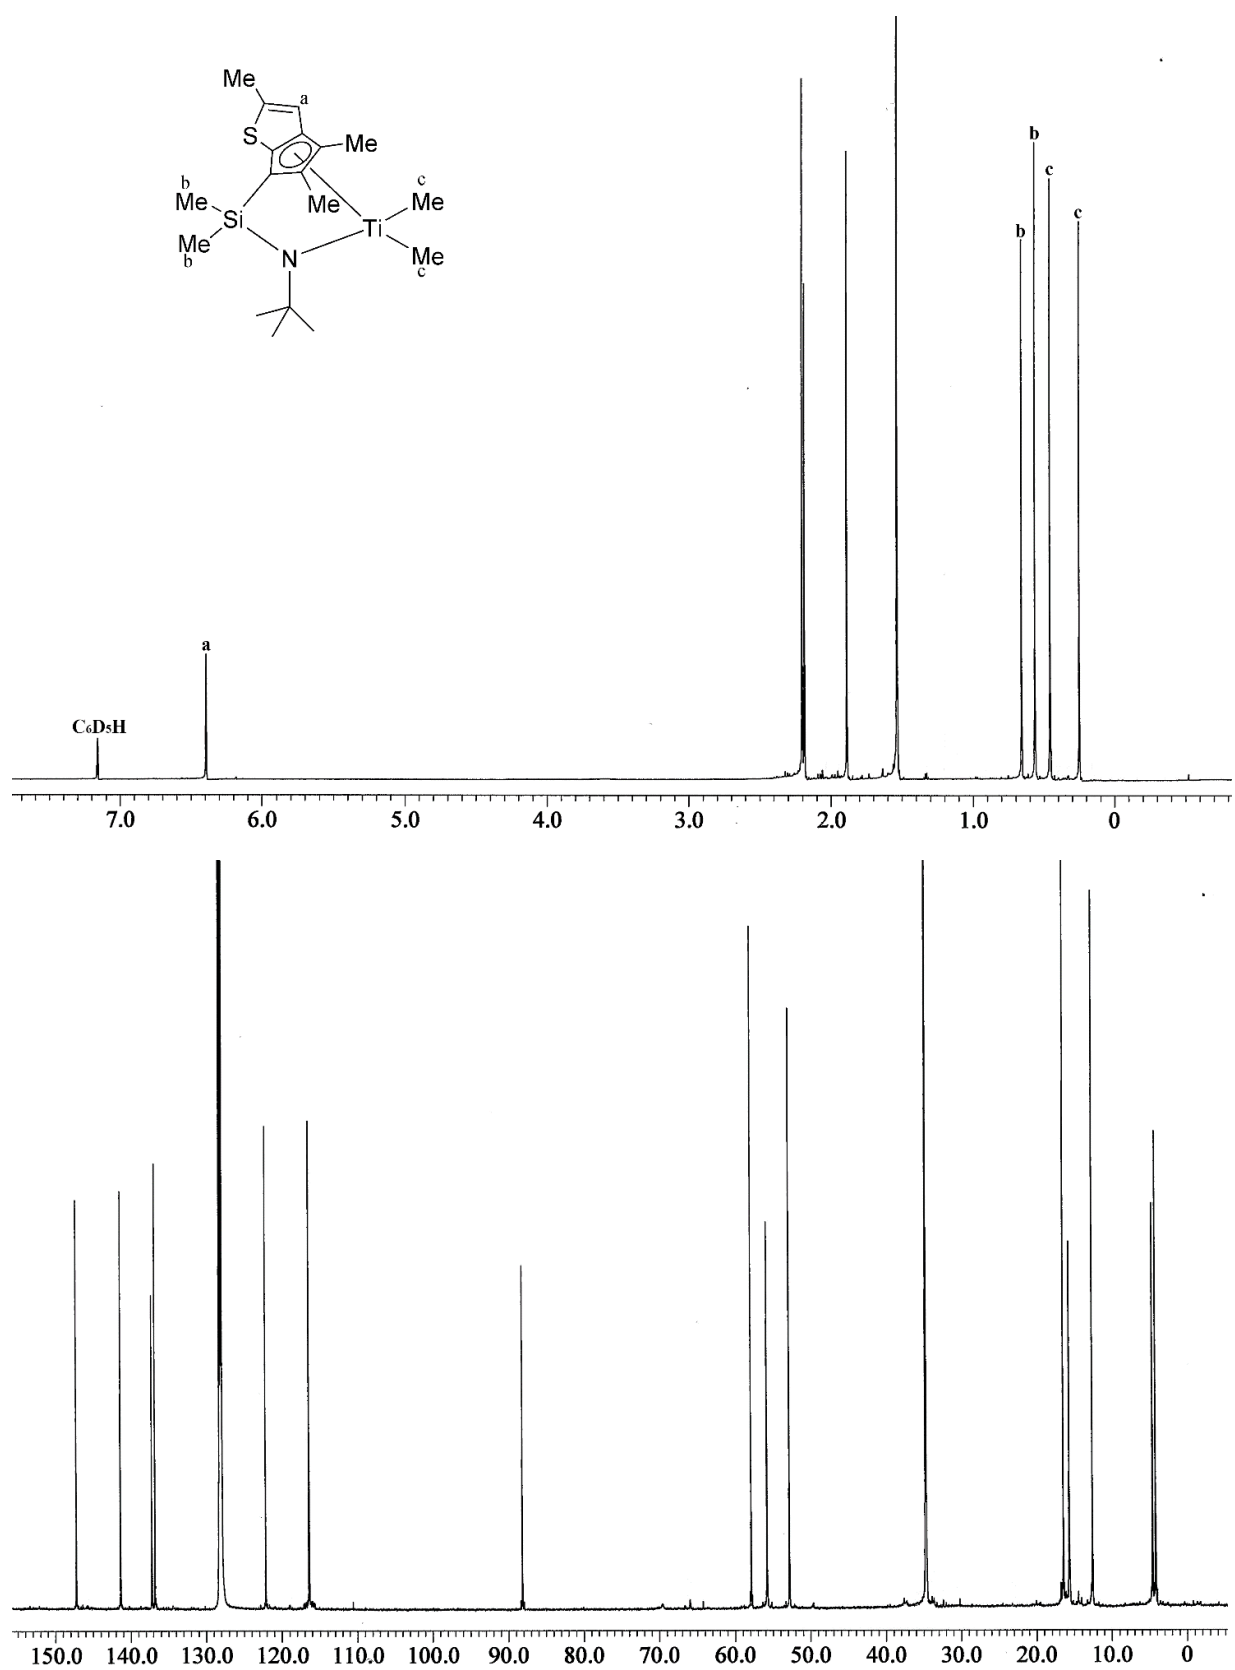

Figure S17.  $^1\text{H}$  and  $^{13}\text{C}$  NMR spectra of 17.

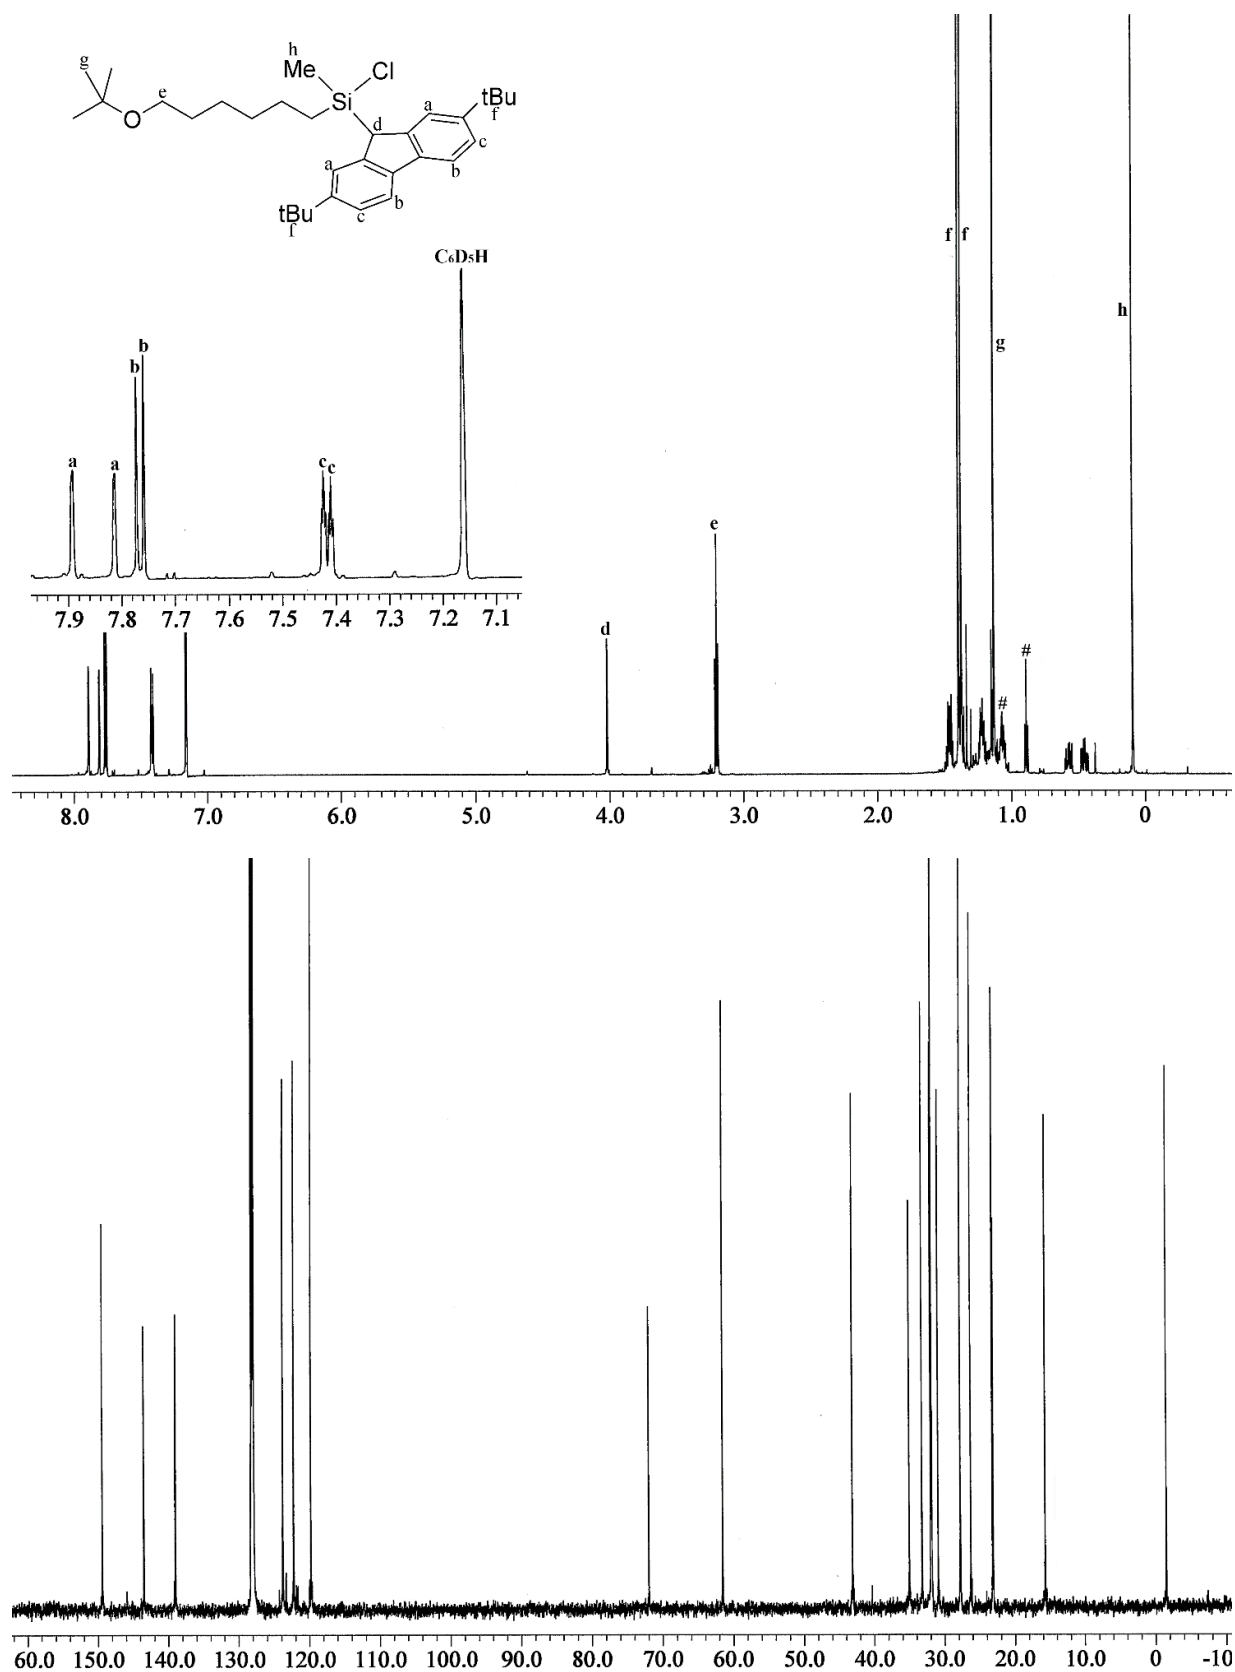

Figure S18.  $^1\text{H}$  and  $^{13}\text{C}$  NMR spectra of 18.

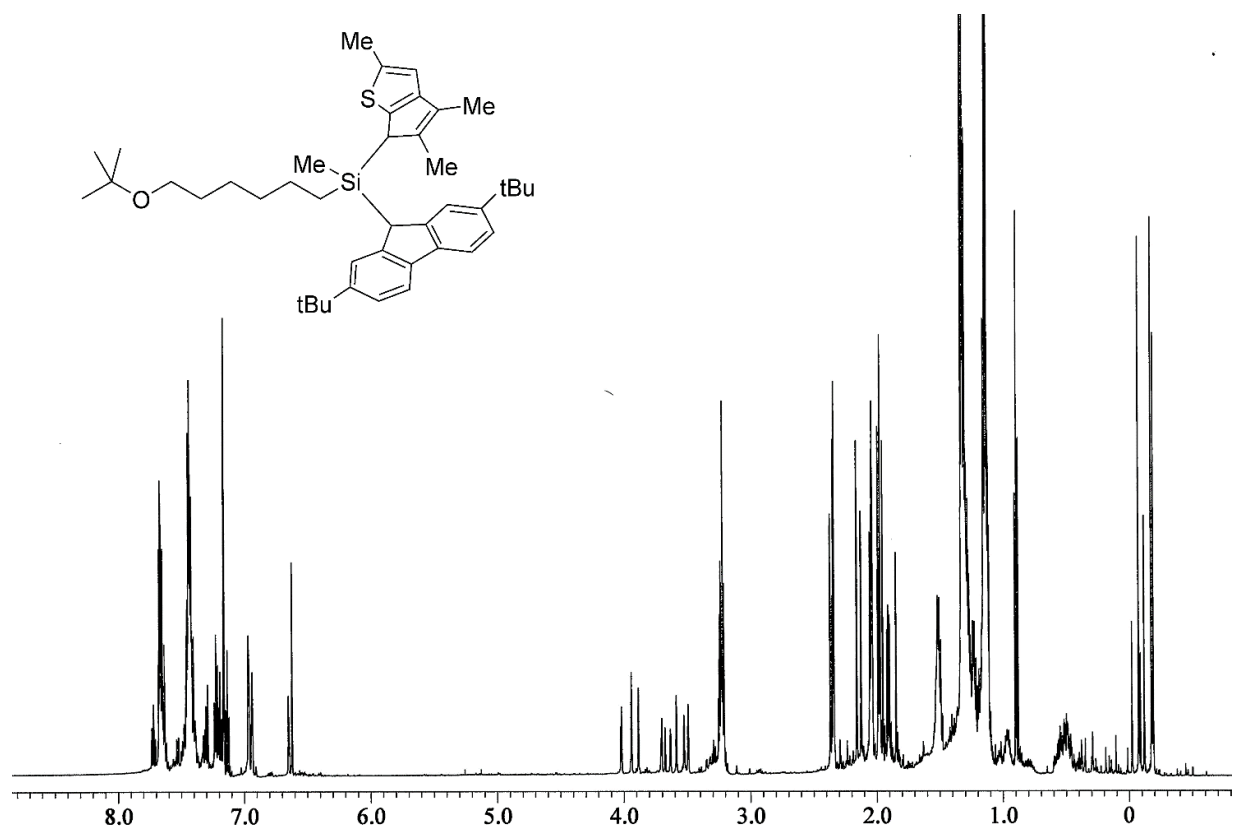

Figure S19. <sup>1</sup>H NMR spectrum of 19.

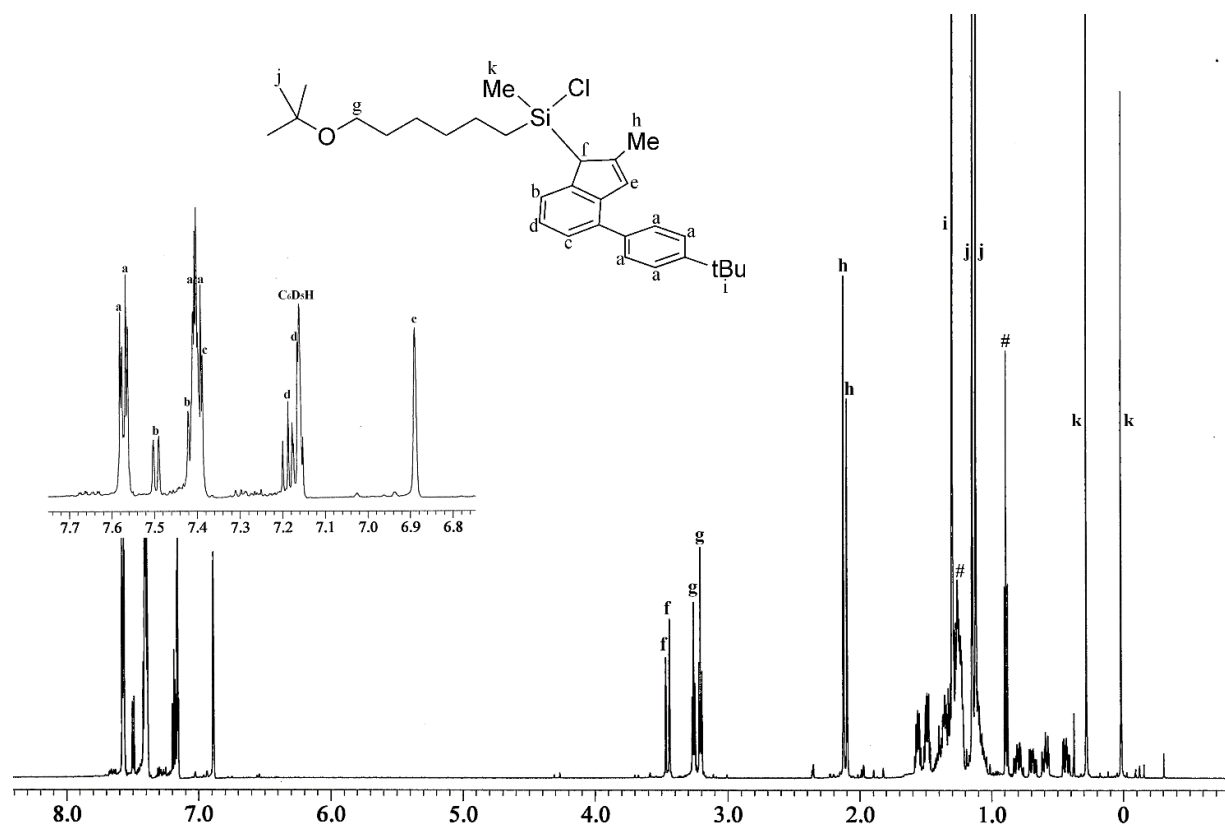

Figure S20.  $^1\text{H}$  NMR spectrum of 21.

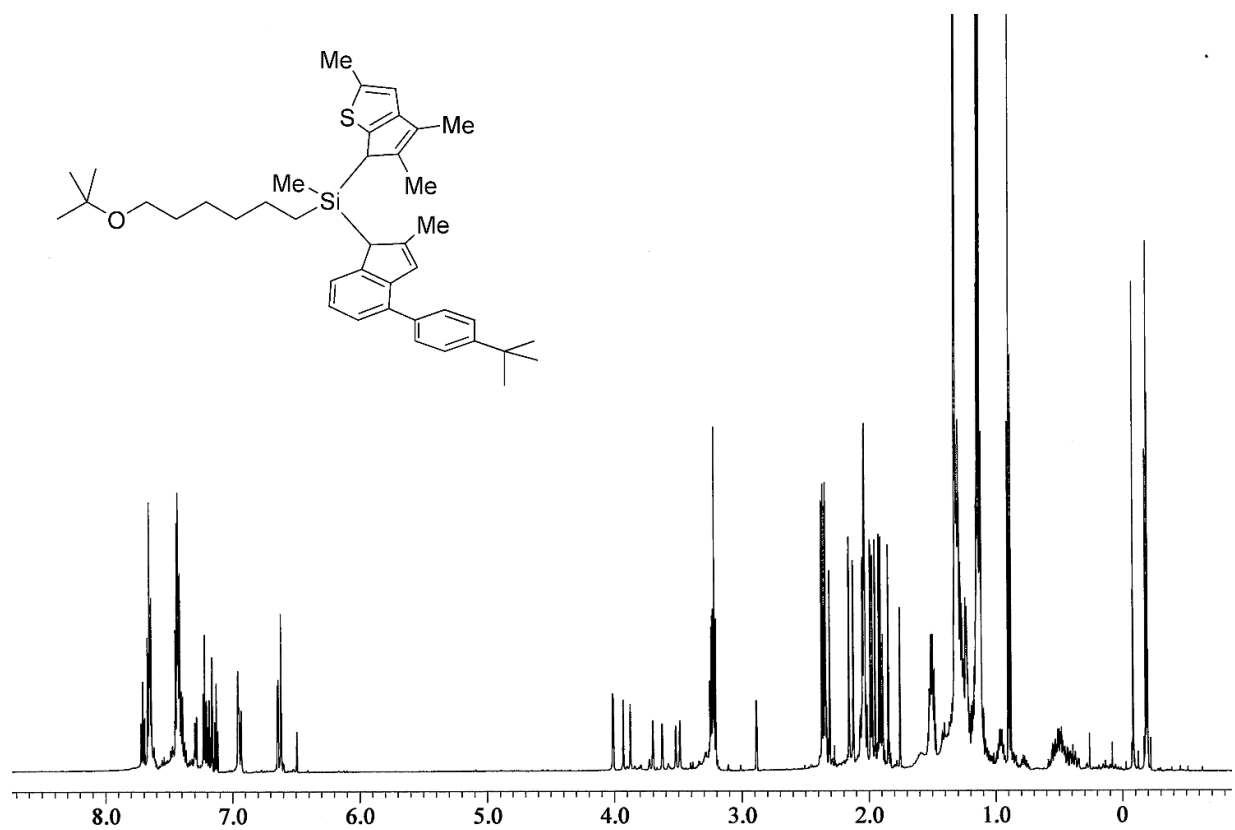

Figure S21.  $^1\text{H}$  NMR spectrum of 22.

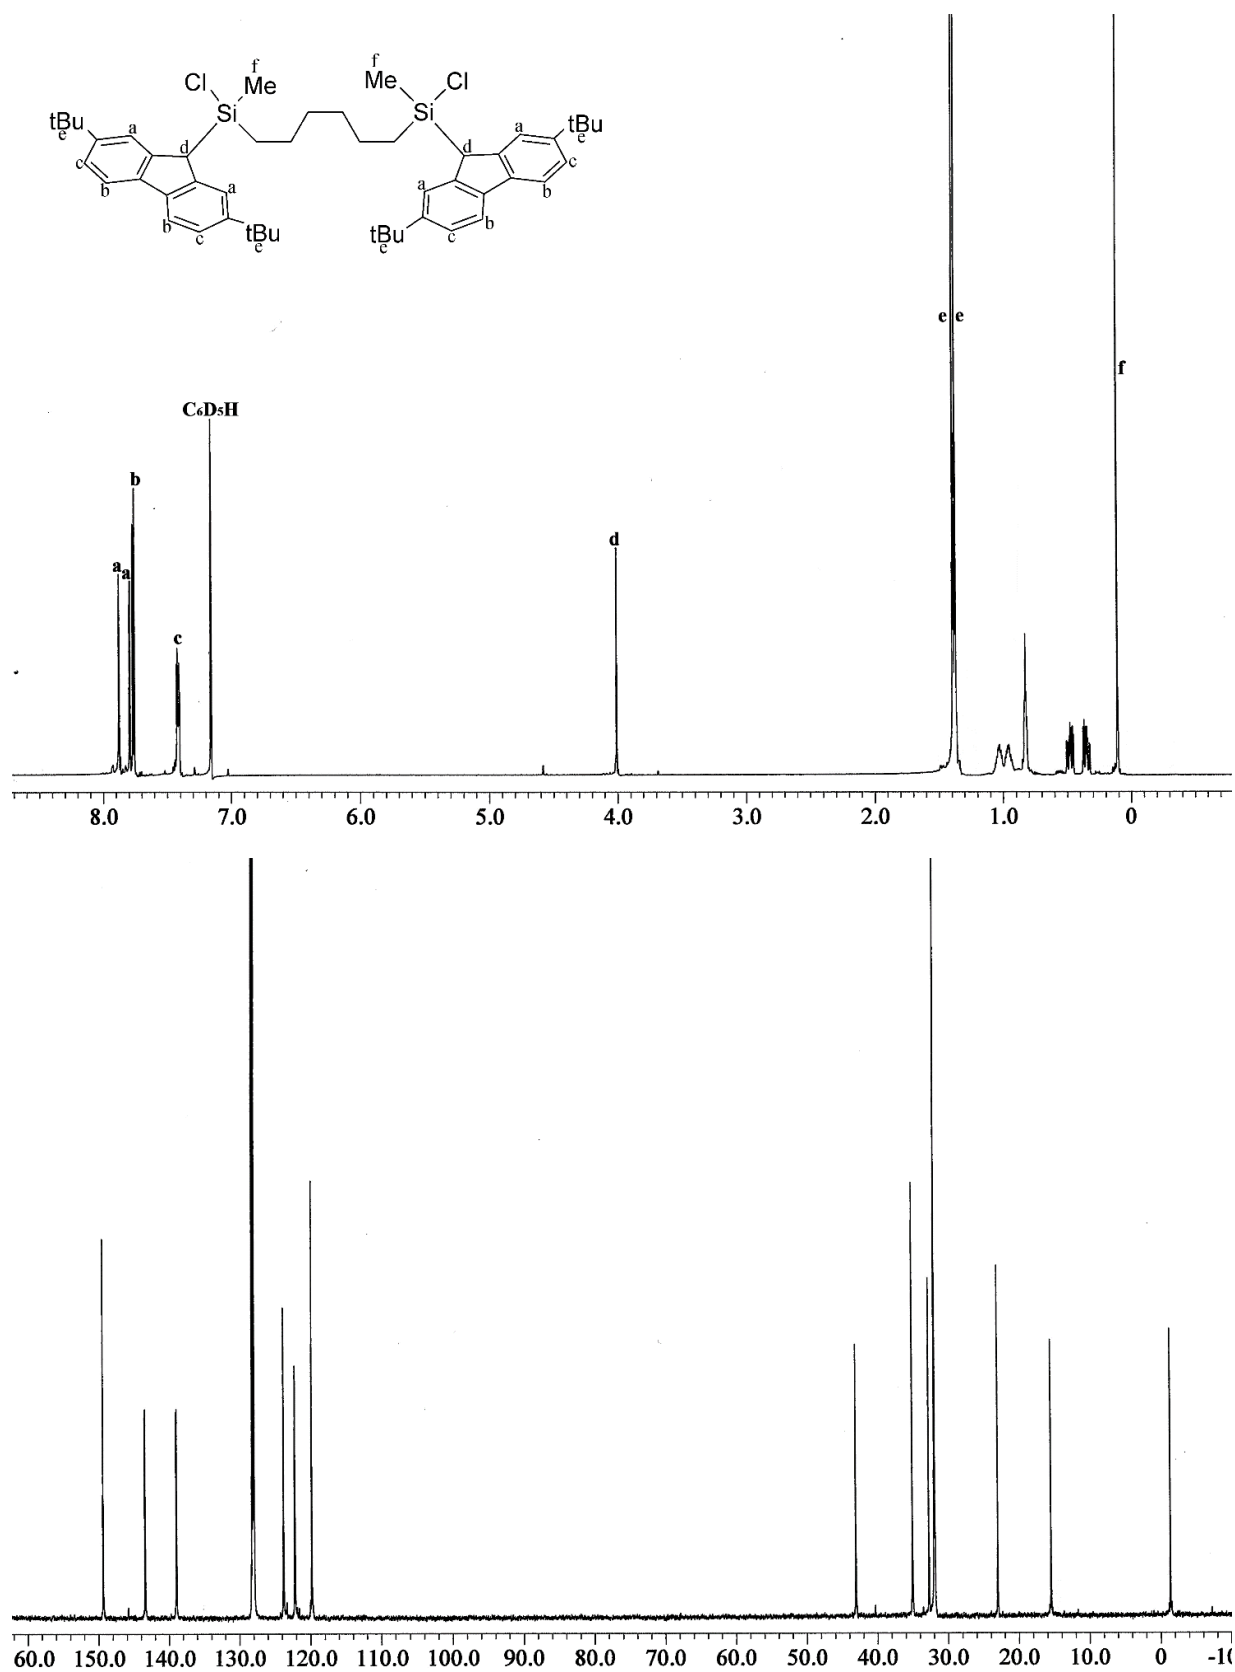

Figure S22.  $^1\text{H}$  and  $^{13}\text{C}$  NMR spectra of 24.

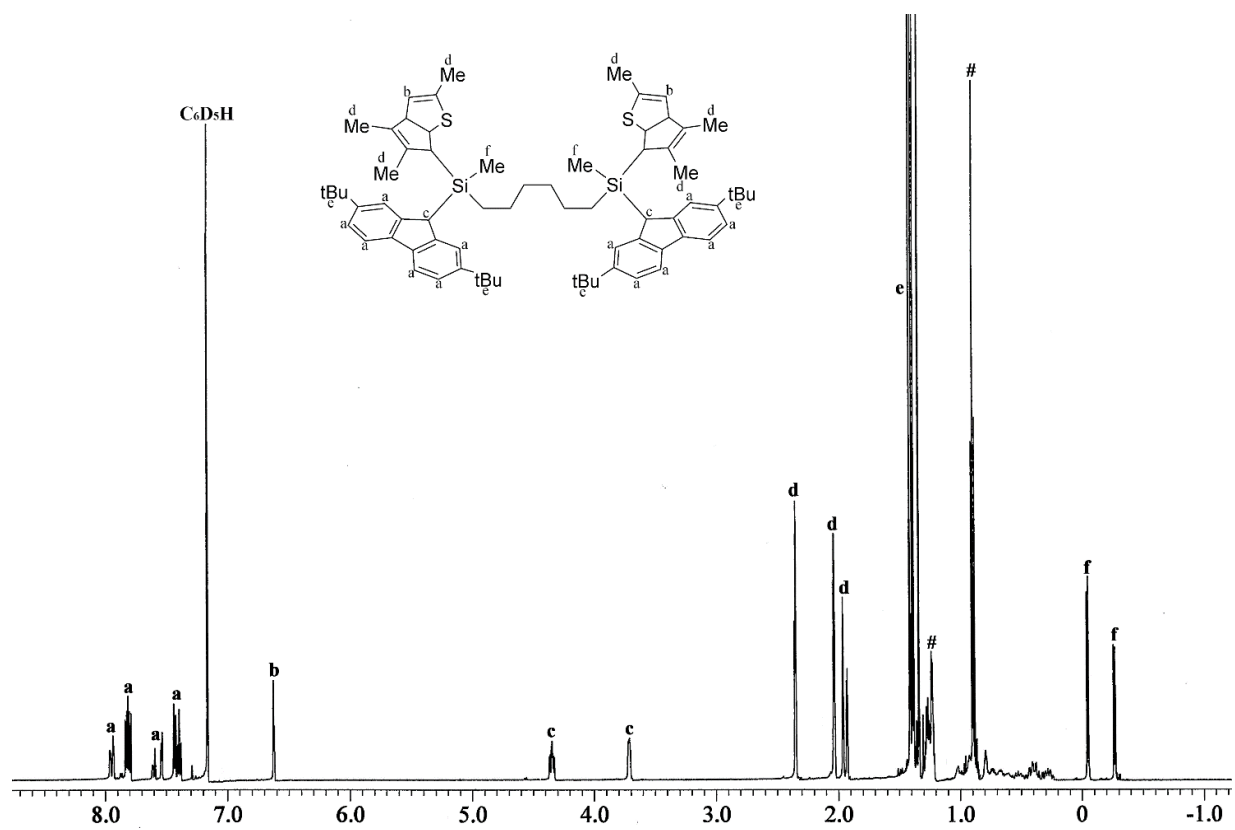

Figure S23.  $^1\text{H}$  NMR spectrum of 25.



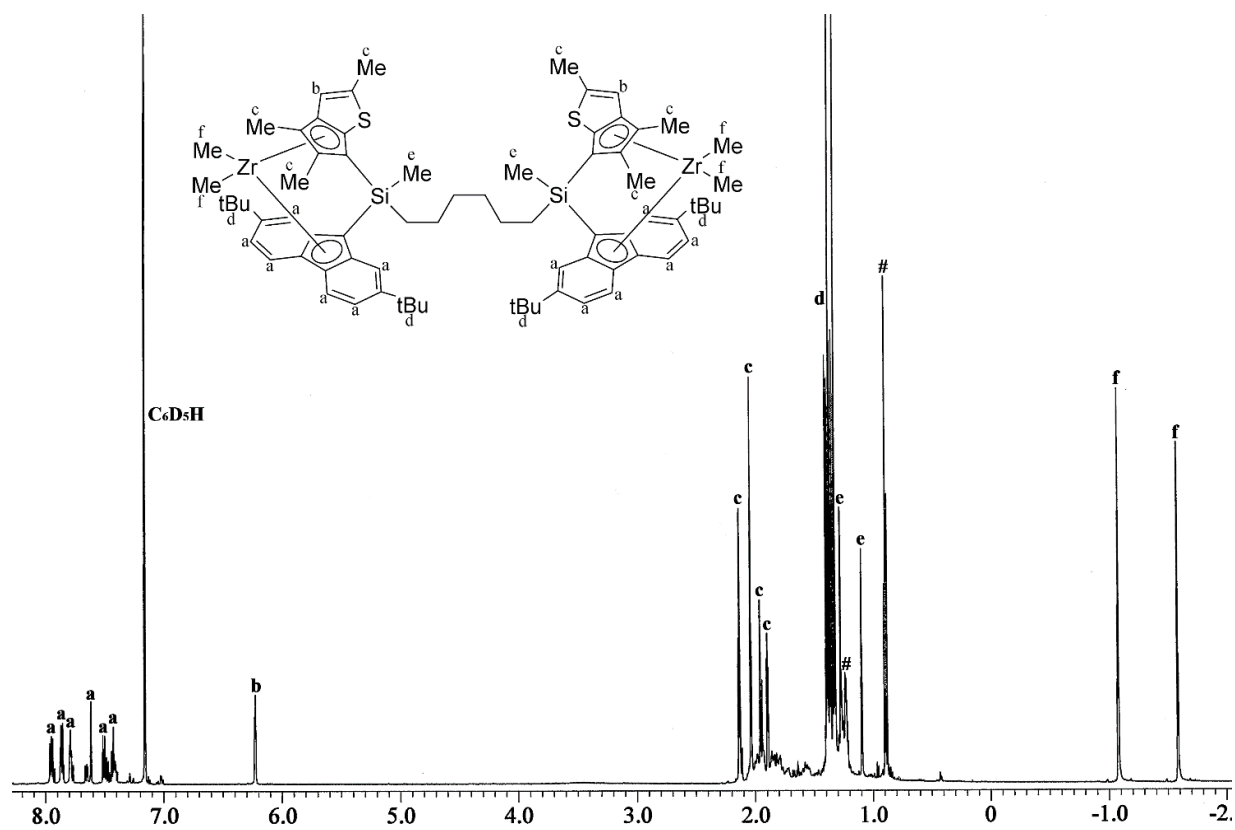

Supplement: s1 [file s1]
